1 **The relevance of dominance and functional annotations to predict**  
2 **agronomic traits in hybrid maize**

3 Guillaume P. Ramstein<sup>1</sup>; Sara J. Larsson<sup>2</sup>; Jason P. Cook<sup>3</sup>; Jode W. Edwards<sup>4</sup>; Elhan S. Ersoz<sup>5</sup>;  
4 Sherry Flint-Garcia<sup>6</sup>; Candice A. Gardner<sup>4</sup>; James B. Holland<sup>7</sup>; Aaron J. Lorenz<sup>8</sup>; Michael D.  
5 McMullen<sup>6</sup>; Mark J. Millard<sup>4</sup>; Torbert R. Rocheford<sup>9</sup>; Mitchell R. Tuinstra<sup>9</sup>; Peter J. Bradbury<sup>10</sup>;  
6 Edward S. Buckler<sup>1,10</sup>; M. Cinta Romay<sup>1</sup>

7 <sup>1</sup> Institute for Genomic Diversity, Cornell University, Ithaca, NY, 14853

8 <sup>2</sup> Section of Plant Breeding and Genetics, Cornell University, Ithaca, NY, 14853. Current  
9 address: Corteva Agriscience, Windfall, IN, 46076

10 <sup>3</sup> Division of Plant Science, University of Missouri, Columbia, MO, 56211. Department of Plant  
11 Sciences and Plant Pathology, Montana State University, MT, 59717

12 <sup>4</sup> USDA-ARS, Ames, IA, 50011. Department of Agronomy, Iowa State University, Ames, IA,  
13 50011

14 <sup>5</sup> Syngenta Seeds, Stanton, MN, 55018. Current address: Umbrella Genetics, Champaign, IL,  
15 61820

16 <sup>6</sup> USDA-ARS, Columbia, MO, 56211. University of Missouri, Columbia, MO, 56211

17 <sup>7</sup> USDA-ARS, Raleigh, NC, 27695. Dep. of Crop Science, North Carolina State University,  
18 Raleigh, NC, 27695

19 <sup>8</sup> Department of Agronomy and Horticulture, University of Nebraska, Lincoln, NE, 68588.

20 Current address: Department of Agronomy and Plant Genetics, University of Minnesota, St Paul,

21 MN, 55108

22 <sup>9</sup> Department of Agronomy, Purdue University, West Lafayette, IN, 47907

23 <sup>10</sup> USDA-ARS, Ithaca, NY, 14853

24

25 **ABSTRACT**

26 Heterosis has been key to the development of maize breeding but describing its genetic basis has  
27 been challenging. Previous studies of heterosis have shown the contribution of within-locus  
28 complementation effects (dominance) and their differential importance across genomic regions.  
29 However, they have generally considered panels of limited genetic diversity and have shown  
30 little benefit to including dominance effects for predicting genotypic value in breeding  
31 populations. This study examined within-locus complementation and enrichment of genetic  
32 effects by functional classes in maize. We based our analyses on a diverse panel of inbred lines  
33 crossed with two testers representative of the major heterotic groups in the United States (1,106  
34 hybrids), as well as a collection of 24 biparental populations crossed with a single tester (1,640  
35 hybrids). We assayed three agronomic traits: days to silking (DTS), plant height (PH) and grain  
36 yield (GY). Our results point to the presence of dominance for all traits, but also among-locus  
37 complementation (epistasis) for DTS and genotype-by-environment interactions for GY.  
38 Consistently, dominance improved genomic prediction for PH only. In addition, we assessed  
39 enrichment of genetic effects in classes defined by genic regions (gene annotation), structural  
40 features (recombination rate and chromatin openness), and evolutionary features (minor allele  
41 frequency and evolutionary constraint). We found support for enrichment in genic regions and  
42 subsequent improvement of genomic prediction for all traits. Our results point to mechanisms by  
43 which heterosis arises through local complementation in proximal gene regions and suggest the  
44 relevance of dominance and gene annotations for genomic prediction in maize.

45

## 46 INTRODUCTION

47 Since the development of the first maize hybrids by Shull (1908) and their widespread adoption  
48 starting in the 1930s, heterosis has been central to the improvement of maize in the United  
49 States. Heterosis, or hybrid vigor, refers to the increase in performance of hybrids relatively to  
50 their average parental performance (Shull 1914). There has been little doubt about the practical  
51 significance of hybrid vigor as it drove considerable breeding gains in maize during the 20<sup>th</sup>  
52 century, but there has been a long-lasting scientific debate about the basis for this phenomenon  
53 (Crow 1998). Predominant hypotheses about the causes of heterosis have related to genetic  
54 complementation of parental genomes. The basis for such complementation consists of non-  
55 additive genetic effects, particularly (over)dominance (within-locus complementation, i.e.,  
56 interaction between alleles within single genetic loci) and epistasis (among-locus  
57 complementation, i.e., interactions involving multiple genetic loci). Overdominance, or  
58 heterozygous advantage, was initially favored as an explanation for heterosis (East 1936, Crow  
59 1948). However, this type of gene action did not account for experimental results, such as the  
60 decrease in the realized degree of dominance over consecutive generations in populations  
61 derived from biparental crosses (Gardner 1963, Moll et al. 1964). Instead, it was proposed that  
62 apparent overdominance was due to dominance gene action at closely-linked polymorphisms  
63 having opposite effects (repulsion phase linkage) (Hill and Robertson 1966, Cockerham and  
64 Zeng 1996, Graham et al. 1997). Epistasis also provides a plausible explanation for genomic  
65 complementation. However, studies assessing its contribution to heterosis have suffered from a  
66 lack of statistical power (Reif et al. 2005) and have reported contrasting results (e.g., Mihaljevic  
67 et al. 2005 and Ma et al. 2007).

68           Genetic studies in maize have investigated dominance gene action by focusing either on  
69   directional dominance, effects of quantitative trait loci (QTL), or genome-wide (polygenic)  
70   effects. Studies on testcrosses or diallel mating designs have investigated directional dominance  
71   by assessing the relationship between heterosis and inter-parent genetic distance (e.g., Reif et al.  
72   2003), or the relationship between testcross means and the genomic contribution of a given  
73   parent to the testcross (e.g., Hinze and Lamkey 2003). Their conclusions seem to support the  
74   presence of directional dominance, particularly for grain yield. Furthermore, studies on  
75   populations derived from backcrosses between recombinant inbred lines and their parents, under  
76   North Carolina III designs, have generally identified several QTL with significant dominant  
77   effects for traits such as flowering time, plant height, and grain yield (e.g., Frascaroli et al. 2007,  
78   Larièpe et al. 2012). Finally, genomic prediction analyses in maize have assessed polygenic  
79   dominance effects for their contribution to genotypic variability. Importantly, these genomic  
80   prediction studies have often focused on factorial designs in which hybrids were obtained from  
81   crosses between lines coming from different heterotic groups: Flint and Dent (e.g., Technow et  
82   al. 2014) or Stiff Stalk and non-Stiff Stalk (e.g., Kadam et al. 2016). Most of these studies have  
83   suggested little contribution of non-additive effects (i.e., specific combining abilities) to  
84   genotypic variability. However, they could not assess the relevance of dominance effects in more  
85   diverse panels in which genomic effects, and heterotic responses, may be more inconsistent, due  
86   to differential levels of genomic complementation within and across heterotic groups (Reif et al.  
87   2005, Gerke et al. 2015).

88           The above-mentioned studies have assayed the relative importance of additive and  
89   dominance effects across the genome, but they have not attempted to describe the properties of  
90   genomic regions most enriched for causal variants. Other studies in maize have characterized the

91 genetic basis of agronomic traits based on locus properties such as gene proximity, structural  
92 features, and/or evolutionary features. Gene proximity has been linked to causal variants in  
93 maize through enrichment for QTL effects (Wallace et al. 2014); additionally, a large portion of  
94 variability of gene expression in maize has been attributed to *cis* polymorphisms (Schadt et al.  
95 2003). Therefore, most polymorphisms underlying genome complementation and hybrid vigor  
96 are expected to lie in proximal gene regions. Structural features may also be functionally relevant  
97 to heterosis in maize. For example, chromatin openness and high recombination rate were  
98 associated with enrichment for QTL effects in maize inbred lines (Rodgers-Melnick et al. 2016).  
99 However, studies on maize hybrids have also shown that heterotic QTL tend to locate around  
100 centromeres, where recombination rate is low (Larièpe et al. 2012, Thiemann et al. 2014,  
101 Martinez et al. 2016). Therefore, it is possible that causal loci for hybrid vigor in maize is  
102 enriched in regions characterized by low recombination rate and closed chromatin, because of  
103 repulsion phase linkage (Hill and Robertson 1966). Evolutionary features characterize allelic  
104 diversity within species (e.g., allele frequency or nucleotide diversity) and across species (e.g.,  
105 evolutionary constraint). Lower allelic diversity has been associated with stronger QTL effects in  
106 hybrid maize (Mezmouk and Ross-Ibarra 2014, Yang et al. 2017). Therefore, loci with low allele  
107 frequency or high evolutionary constraint may have stronger effects on heterosis in maize.  
108 Importantly, structural and evolutionary features have also been associated with gene density.  
109 For example, Beissinger et al. (2016) and Rodgers-Melnick et al. (2016) have reported lower  
110 nucleotide diversity and more open chromatin near genes, respectively. So, there is ambiguity  
111 about the relevance of evolutionary and structural features to capture variability at agronomic  
112 traits independently from gene proximity.

113           In this study, we aimed at characterizing the genetic basis of hybrid vigor for three  
114 agronomic traits (days to silking, plant height, and grain yield) in panels representative of genetic  
115 diversity in maize. We analyzed two hybrid panels: one was derived from crosses between a  
116 diverse sample of maize inbred lines and either of two testers, B47 and PHZ51, belonging  
117 respectively to the Stiff Stalk (SS) and non-Stiff Stalk (NSS) heterotic groups; the other was  
118 derived from crosses between the US Nested Association Mapping (NAM) panel and PHZ51.  
119 We investigated the importance of dominance for heterosis in maize by (i) the contribution of  
120 polygenic dominance to genotypic variability, (ii) the existence of significant dominance effects  
121 at QTL, and (iii) directional effects of dominance by inbreeding. In addition, we tested the  
122 hypotheses that most genetic effects involved in dominance are located (i) near genes, (ii) in low-  
123 recombination regions, and (iii) at evolutionarily constrained loci (Figure 1). Our study is  
124 focused on the usefulness of genetic effects partitioned by gene action (additive or dominance  
125 effects) and functional classes (based on gene proximity and structural or evolutionary features),  
126 for applications such as prioritization of SNP markers and genomic prediction.

127

| ① Within-locus complementation                |      |        |        |
|-----------------------------------------------|------|--------|--------|
| Hypothesis                                    | DTS  | PH     | GY     |
| Partition of variability by dominance effects | +    | +      | +      |
| Dominance effects at QTLs                     | N.S. | No QTL | No QTL |
| Linear effect of inbreeding                   | -    | +      | +      |
| Conclusion                                    | DTS  | PH     | GY     |
| Prevalent dominance gene action               | -    | +      | +      |

  

| ② Enrichment of genetic effects by functional features |      |      |      |
|--------------------------------------------------------|------|------|------|
| Hypothesis                                             | DTS  | PH   | GY   |
| Enrichment in genic regions                            | +    | +    | +    |
| Enrichment in low-recombination regions                | N.S. | N.S. | N.S. |
| Enrichment at evolutionarily constrained loci          | N.S. | N.S. | N.S. |
| Conclusion                                             | DTS  | PH   | GY   |
| Complementation in proximal gene regions               | +    | +    | +    |

128

129 **Figure 1 – Graphical summary of the study.** Two rationales were tested: (1) dominance gene  
 130 action explains heterosis in maize; (2) genetic effects underlying heterosis are enriched by  
 131 functional classes. Under each rationale, evidence from analyses is characterized as consistent  
 132 (+) or inconsistent (-) with scientific hypotheses. Non-conclusive evidence is either due to  
 133 absence of QTL (No QTL) or lack of significance (N.S.).



## 134 MATERIAL AND METHODS

### 135 Phenotypic data

#### 136 *Phenotypic measurements*

137 In this study, two panels of maize lines were assayed for hybrid performance: the NCRPIS  
138 association panel (hereafter, Ames) and the nested association mapping panel (hereafter, NAM).  
139 The Ames panel comprises a subset of temperate inbred lines from the diversity panel described  
140 by Romay et al. (2013); the NAM panel is a subset of 24 recombinant inbred line (RIL)  
141 populations, all having one parent in common, B73, as described by McMullen *et al.* (2009).

142 In the hybrid Ames panel, a subset of 875 inbred lines was selected to reduce differences  
143 in flowering time while favoring genetic diversity based on pedigree information. Two inbred  
144 lines, formerly under Plant Variety Protection, were selected as testers: one non-Stiff Stalk  
145 (NSS) inbred (PHZ51) and one Stiff Stalk (SS) inbred (B47, also known as PHB47). Inbreds  
146 were assigned to one or two testers based on known heterotic group: SS inbreds were crossed  
147 with PHZ51, while NSS inbreds were crossed with B47; inbreds with unknown heterotic group  
148 as well as inbreds belonging to the Goodman association panel (Flint-Garcia et al. 2005) were  
149 crossed with both testers, for a total of 1,111 hybrids. Hybrids were assigned to one of four  
150 combinations, based on tester (PHZ51 or B47) and maturity (early or late). Each combination  
151 was split into three sets based on expected plant height (short, medium, or tall). Each of those 12  
152 groups were arranged in an incomplete block (alpha-lattice) design. Sets were randomized for  
153 each environment, and tester-maturity combinations were randomized within each set. One  
154 common check (B73×PHZ51) was randomly included in each block of the lattices, and each  
155 lattice randomly included three additional checks (PHZ51×B47, B47×PHZ51, and a maturity  
156 commercial check). In the Ames panel, evaluation was performed in 2011 and 2012, in six

157 locations across the US – Ames (IA), West Lafayette (IN), Kingston (NC), Lincoln (NE), Aurora  
158 (NY), and Columbia (MO) – for a total of nine unique environments: 11IA, 11IN, 11NC, 11NE,  
159 11NY, 11MO, 12NE, 12NC, and 12MO.

160 In the hybrid NAM panel, selection and evaluation were performed as described by  
161 Larsson et al. (2017). Briefly, a subset of 60 to 70 RILs from each of the NAM families was  
162 selected to reduce differences in flowering time across families: the later RILs from the earliest  
163 families and the earlier RILs from the latest families, for a total of 1,799 RILs. All RILs were  
164 crossed with the same tester: PHZ51. Hybrids were evaluated in five different locations – Ames  
165 (IA), West Lafayette (IN), Kingston (NC), Aurora (NY), and Columbia (MO) – during 2010 and  
166 2011 for a total of eight unique environments: 10IA, 10IN, 10NC, 10MO, 11IA, 11IN, 11NC,  
167 and 11NY.

168 Both NAM and Ames hybrids were planted in two-row plots (40-80 plants per plot;  
169 50,000 to 75,000 plants per hectare), except for 11NY, where 12 plants were planted per plot.  
170 The following traits were measured: days to silking (number of days from planting until 50% of  
171 the plants had silks; DTS), plant height (cm from soil to flag leaf; PH), and grain yield (t/ha  
172 adjusted to 15.5% moisture; GY). In 11NY, only PH and DTS were measured (Table 1).

### 173 *Genotype means and heritability*

174 Genotype means of hybrids were estimated by a linear mixed model, fitted by ASREML-R v3.0  
175 (Butler et al. 2009). For each combination of panel (Ames or NAM panel) and trait (DTS, PH, or  
176 GY), the following effects were estimated: genotype [fixed], environment [random, independent,  
177 and identically normally distributed (i.i.d.)], field within environment [random, i.i.d.], and, if  
178 possible, spatial effects within environment/field combinations [random, normally distributed  
179 under first-order autoregressive covariance structures by row and column]. Since genotypes were

180 not replicated within environments, genotype-by-environment interactions were pooled with  
181 residual variation. For PH in both panels, spatial effects were not included in the model because  
182 the fitting algorithm could not converge to a solution. For GY in both panels, DTS measurements  
183 [fixed] were included in the model to account for phenological differences among lines. In  
184 addition to estimating genotype effects as fixed, models with genotype effects as random were  
185 also fitted to estimate genotypic variance ( $\sigma_g^2$ ) and error variance ( $\sigma_e^2$ ). Broad-sense heritability  
186 on a plot basis was then calculated as  $H^2 = \frac{\sigma_g^2}{\sigma_g^2 + \sigma_e^2}$ . Finally, entry-mean reliability was estimated  
187 as  $r_g^2 = 1 - \frac{1}{n} \sum_{i=1}^n \frac{\text{Var}(g_i - \hat{g}_i)}{\sigma_g^2}$ , where  $n$  is the number of hybrids assayed in either panel and  
188  $\text{Var}(g_i - \hat{g}_i)$  is the prediction error variance of genotype mean for hybrid  $i$  (Searle et al. 2009).

## 189 **Genotypic data**

### 190 *Marker data*

191 All the inbreds that were used to create the evaluated hybrids were originally genotyped using  
192 genotyping-by-sequencing (GBS) (Romay et al. 2013, Rodgers-Melnick et al. 2015). Single-  
193 nucleotide polymorphisms (SNPs) were called with the software TASSEL v5.0 (Bradbury et al.  
194 2007) using the GBS production pipeline and the ZeaGBSv2.7 Production TOPM obtained from  
195 more than 60,000 Zea GBS samples (Glaubitz et al. 2014).

196 The GBS SNPs in both panels were used for imputing marker scores (alternate-allele  
197 counts) called at whole-genome-sequencing (WGS) SNPs from the Hapmap 3.2.1 panel, under  
198 version 4 of the reference B73 genome (Bukowski et al. 2018). From the original WGS dataset  
199 heterozygote SNPs were set to missing (since these were presumably due to errors or collapsed  
200 paralogous loci) and WGS SNPs were filtered out if they did not satisfied the following criteria:  
201 two alleles by SNP, call rate > 50%, and minor allele count > 3. A total of 25,555,019 positions

202 across the reference genome were then selected for imputation. Marker scores were imputed by  
203 BEAGLE v5 (Browning and Browning 2018), with the following parameters: 10 burn-in  
204 iterations, 15 sampling iterations, and effective population size set to 1000. Marker scores at  
205 WGS SNPs were first fully imputed and phased in the Hapmap 3.2.1 panel; then, they were  
206 imputed in the Ames panel and the NAM panel separately, based on GBS SNPs using the  
207 imputed Hapmap 3.2.1 panel as reference.

208 In subsequent analyses, hybrids were divided in four sets: Ames/PHZ51, Ames/B47, the  
209 entire Ames hybrid panel (Ames/PHZ51+B47), and NAM/PHZ51. These sets comprised 463,  
210 643, 1106, and 1640 hybrids, respectively. After imputation, WGS SNPs were further filtered for  
211 the following criteria in every set, based on the respective subsets of inbreds: minor allele  
212 frequency  $\geq 0.01$ ; estimated squared correlation between imputed and actual marker scores  $\geq 0.8$   
213 (Browning and Browning 2009). Marker scores at selected WGS SNPs were then inferred for  
214 each hybrid by using CreateHybridGenotypesPlugin in TASSEL v5.0; at each selected WGS  
215 SNP, female and tester marker scores were combined, unless either of these was heterozygous or  
216 missing (in which case the hybrid genotype was set to missing). After filtering by quality and  
217 variability of marker scores, a total of  $m = 12,659,487$  WGS SNPs were retained for  
218 subsequent analyses (14,846,984 to 15,733,697 SNPs were selected due to filters on minor allele  
219 frequency alone). In a given set, the marker data consisted of the matrix  $\mathbf{X}$  of minor-allele  
220 counts, where minor alleles were defined by frequencies in the Hapmap 3.2.1 panel, and the  
221 matrix  $\mathbf{Z}$  of heterozygosity, which coded homozygotes as 0 and heterozygotes as 1.

## 222 *Population principal components*

223 Principal component analysis (PCA) was performed using the R package irlba v2.3.3 (Baglama  
224 and Reichel 2005), based on the Goodman association panel, presumed to represent the genetic

225 diversity among elite maize inbred lines (Flint-Garcia et al. 2005). Matrix  $\mathbf{P}$ , consisting of  
226 coordinates at the first three PCs in hybrids, was obtained by (i) adjusting marker scores by their  
227 observed mean in the Goodman association panel, and (ii) mapping adjusted marker scores to  
228 PCs by the SNP loadings from PCA, i.e.,  $\mathbf{P} = (\mathbf{X} - \mathbf{M})\mathbf{V}$ , where  $\mathbf{X} - \mathbf{M}$  is the matrix of adjusted  
229 marker scores and  $\mathbf{V}$  is the  $m \times 3$  matrix of right-singular vectors from PCA.

## 230 **Functional features**

231 *Gene annotation: proximity to genes*

232 Gene positions were available from v4 gene annotations, release 40

233 ([ftp://ftp.ensemblgenomes.org/pub/plants/release-](ftp://ftp.ensemblgenomes.org/pub/plants/release-40/gff3/zea_mays/Zea_mays.AGPv4.40.gff3.gz)

234 [40/gff3/zea\\_mays/Zea\\_mays.AGPv4.40.gff3.gz](ftp://ftp.ensemblgenomes.org/pub/plants/release-40/gff3/zea_mays/Zea_mays.AGPv4.40.gff3.gz)). Gene proximity bins (either ‘Proximal’ or

235 ‘Distal’) then indicated whether any given SNP was within 1 kb of an annotated gene (less than 1

236 kb away from the start or end positions).

237 *Structural features: recombination rate and chromatin openness*

238 Previously published recombination maps identified genomic segments originating from either

239 parent within the progeny of each NAM family (Rodgers-Melnick et al. 2015). These maps were

240 uplifted to version 4 of the reference genome using CrossMap v0.2.5 (Zhao et al. 2014). Then,

241 the average numbers of recombination events (recombination fractions) were fitted on genomic

242 positions by a thin-plate regression spline model, by the R package mgcv v1.8-27 (Wood 2003).

243 Based on this model, recombination rates  $\mathbf{c}$  were inferred by finite differentiation of fitted

244 recombination fractions:  $\mathbf{c} = f\left(\mathbf{s} + \frac{1}{2}\right) - f\left(\mathbf{s} - \frac{1}{2}\right)$ , where  $\mathbf{s}$  is the vector of genomic positions

245 of all WGS SNPs, and  $f$  is the function inferred by the spline model. Finally, we defined

246 recombination bins as follows:  $c_j \leq 0.45$  cM/Mb,  $0.45$  cM/Mb  $< c_j \leq 1.65$  cM/Mb, and  $1.65$

247  $cM/Mb < c_j$ , where 0.45 cM/Mb and 1.65 cM/Mb are the first two tertiles of estimated  
248 recombination rates  $c_j$  among all WGS SNPs.

249 Chromatin accessibility was previously assessed by micrococcal nuclease hypersensitivity  
250 (MNase HS) in juvenile root and shoot tissues in B73 (Rodgers-Melnick et al. 2016). Here,  
251 MNase HS peaks were mapped to their coordinates in version 4 of the reference genome. A  
252 given SNP was considered to lie in a euchromatic (open) region if a MNase HS peak was  
253 detected, in either root or shoot tissues. We then defined MNase HS bins as ‘Dense’ or ‘Open’  
254 for the absence or presence of MNase HS peaks, respectively.

#### 255 *Evolutionary features: minor allele frequency and evolutionary constraint*

256 Minor allele frequencies (MAF) at SNPs were determined based on the Hapmap 3.2.1 panel in  
257 version 4 of the reference genome, without imputation of marker scores. Similarly to Evans et al.  
258 (2018), we defined MAF bins as follows:  $MAF \leq 0.01$ ,  $0.01 < MAF \leq 0.05$ , and  $0.05 < MAF$   
259 (SNPs were not binned at  $MAF \leq 0.0025$  due to only 7,202 of them falling into this class).

260 Evolutionary constraints at SNPs were reflected by genomic evolutionary rate profiling (GERP)  
261 scores, as introduced by Davydov et al. (2010). Here we derived GERP scores from a whole-  
262 genome alignment of 13 plant species (Rodgers-Melnick et al. 2015, Yang et al. 2017), based on  
263 coordinates in version 4 of the reference genome. We defined GERP score bins as  $GERP \leq 0$  and  
264  $GERP > 0$ .

#### 265 **Genome-wide polygenic models**

##### 266 *Additive effects*

267 Genome-wide additive effects were estimated under a standard genomic BLUP (GBLUP) model  
268 (VanRaden 2008), as follows:

269  $\mathbf{y} = \mathbf{Q}\boldsymbol{\delta} + \mathbf{u} + \mathbf{e}; \mathbf{u} \sim N(\mathbf{0}, \mathbf{G}\sigma_u^2), \mathbf{e} \sim N(\mathbf{0}, \mathbf{I}\sigma_e^2), \mathbf{G} = \mathbf{X}\mathbf{X}'/m$

270 where  $\mathbf{y}$  was the vector of genotype means;  $\mathbf{Q} = [\mathbf{1} \quad \mathbf{P}]$  was the matrix consisting of a vector of  
271 ones and the first three PCs as described above;  $\boldsymbol{\delta}$  were fixed effects;  $\mathbf{u}$  and  $\mathbf{e}$  consisted of  
272 polygenic additive genomic effects and random errors, respectively. The GBLUP model was  
273 fitted in Ames/PHZ51+B47 or NAM/PHZ51, by restricted maximum likelihood (REML) using  
274 the R package regress v1.3-15 (Clifford and McCullagh 2005).

275 For comparison to Bayesian sparse linear mixed models (see next section below), we also fitted  
276 RR-BLUP models where the effects of PCs were not explicitly accounted for by fixed effects,  
277 i.e.,  $\mathbf{y} = \mathbf{1}\mu + \mathbf{X}\boldsymbol{\alpha} + \mathbf{e}; \boldsymbol{\alpha} \sim N(\mathbf{0}, \mathbf{I}\sigma_\alpha^2), \mathbf{e} \sim N(\mathbf{0}, \mathbf{I}\sigma_e^2)$ , where  $\boldsymbol{\alpha}$  consisted of random additive  
278 marker effects. The RR-BLUP model was fitted in Ames/PHZ51+B47 or NAM/PHZ51, by  
279 REML using GEMMA v0.98.1 (Zhou and Stephens 2012).

#### 280 *Additive and dominance effects*

281 To account for dominance, the GBLUP model was extended to the dominance GBLUP  
282 (DGBLUP) model, as follows:

283  $\mathbf{y} = \mathbf{Q}\boldsymbol{\delta} + \mathbf{u} + \mathbf{w} + \mathbf{e}; \mathbf{u} \sim N(\mathbf{0}, \mathbf{G}\sigma_u^2), \mathbf{w} \sim N(\mathbf{0}, \mathbf{D}\sigma_w^2), \mathbf{e} \sim N(\mathbf{0}, \mathbf{I}\sigma_e^2), \mathbf{G} = \mathbf{X}\mathbf{X}'/m, \mathbf{D} =$   
284  $\mathbf{Z}\mathbf{Z}'/m \quad (1)$

285 where  $\mathbf{w}$  consisted of polygenic dominance effects. Model (1) was fitted in Ames/PHZ51+B47,  
286 by REML using the R package regress v1.3-15 (Clifford and McCullagh 2005).

#### 287 *Directional effects*

288 Directional effects arise from consistent genetic effects across loci, such that their average is  
289 non-zero. An example of directional effects about dominance is inbreeding depression, due to  
290 genome-wide dominance effects being usually positive for fitness. Under a simple dominance

291 model without linkage nor epistasis, inbreeding depression is characterized by a linear negative  
292 relationship between the inbreeding coefficient and fitness (Falconer and Mackay 1996).  
293 Moreover, in presence of directional epistatic effects, the relationship between the inbreeding  
294 coefficient and fitness is expected to be nonlinear (Crow and Kimura 1970). To capture such  
295 nonlinearity, specifically dominance×dominance epistasis, the quadratic effect of the inbreeding  
296 coefficient was fitted along with its linear effect. We followed Endelman and Jannink (2012) to  
297 estimate genomic inbreeding coefficients with respect to a base population, here represented by  
298 the Goodman association panel. For each hybrid  $i$ , the coefficient of genomic inbreeding was  
299 calculated as  $F_i = \frac{\sum_j (x_{ij} - 2\pi_j)^2}{\sum_j 2\pi_j(1-\pi_j)} - 1$ , where  $\pi_j$  was the allele frequency in the Goodman  
300 association panel.

301 Directional effects of inbreeding were assayed as fixed effects under an extension of the  
302 DGBLUP model (1). The following model was fitted:

$$\begin{aligned} 303 \mathbf{y} &= \mathbf{Q}\boldsymbol{\delta} + \mathbf{R}\boldsymbol{\tau} + \mathbf{u} + \mathbf{w} + \mathbf{e}; \mathbf{u} \sim N(\mathbf{0}, \mathbf{G}\sigma_u^2), \mathbf{w} \sim N(\mathbf{0}, \mathbf{D}\sigma_w^2), \mathbf{e} \sim N(\mathbf{0}, \mathbf{I}\sigma_e^2), \mathbf{G} = \mathbf{X}\mathbf{X}'/m, \\ 304 \mathbf{D} &= \mathbf{Z}\mathbf{Z}'/m \quad (2) \end{aligned}$$

305 where  $\mathbf{R}$  and  $\boldsymbol{\tau}$  consisted of genomic inbreeding values and their directional effects (linear or  
306 quadratic), respectively. Significance of estimates of  $\boldsymbol{\tau}$  was assessed by Wald tests. Model (2)  
307 was fitted in Ames/PHZ51+B47 or NAM/PHZ51, by REML using the R package regress v1.3-  
308 15 (Clifford and McCullagh 2005).

### 309 **Oligogenic models**

310 Oligogenic effects of SNPs were inferred using association models which estimated the effect of  
311 each SNP while accounting for background polygenic SNP effects. Two types of models were



312 used: standard linear mixed models, where the effect of each SNP was estimated separately, and  
313 Bayesian linear models, where effects of all SNPs under assay were fitted simultaneously.

#### 314 *Genome-wide association models*

315 Standard linear mixed models were genome-wide association study (GWAS) models fitted to  
316 assess the significance of SNPs for additive effects only (marginal additive effects), or additive  
317 and dominance effects simultaneously.

318 For assessing marginal additive effects ( $\beta_j$ , fixed, for each SNP  $j$ ), the following model was

319 fitted in Ames/PHZ51+B47 or NAM/PHZ51:  $\mathbf{y} = \mathbf{Q}\boldsymbol{\delta} + \mathbf{x}_j\beta_j + \mathbf{u} + \mathbf{e}; \mathbf{u} \sim N(\mathbf{0}, \mathbf{G}\sigma_u^2),$

320  $\mathbf{e} \sim N(\mathbf{0}, \mathbf{I}\sigma_e^2), \mathbf{G} = \mathbf{X}\mathbf{X}'/m$ . For assessing additive and dominance effects ( $\beta_j$  and  $\theta_j$ , fixed, for

321 each SNP  $j$ ), the previous model was extended in Ames/PHZ51+B47 to incorporate dominance

322 for both fixed effects and random effects:  $\mathbf{y} = \mathbf{Q}\boldsymbol{\delta} + \mathbf{x}_j\beta_j + \mathbf{z}_j\theta_j + \mathbf{u} + \mathbf{w} + \mathbf{e}; \mathbf{u} \sim N(\mathbf{0}, \mathbf{G}\sigma_u^2),$

323  $\mathbf{w} \sim N(\mathbf{0}, \mathbf{D}\sigma_w^2), \mathbf{e} \sim N(\mathbf{0}, \mathbf{I}\sigma_e^2), \mathbf{G} = \mathbf{X}\mathbf{X}'/m, \mathbf{D} = \mathbf{Z}\mathbf{Z}'/m$ . GWAS models were fitted under the

324 EMMAX approximation of Kang et al. (2010), using function fastLm in the R package

325 RcppEigen v0.3.3.5.0 (Bates and Eddelbuettel 2013). Significance of SNPs was assessed by

326 Wald tests on estimates of  $\beta_j$  and  $\theta_j$ . False discovery rates (FDR) were estimated based on p-

327 values from Wald tests by the method of Benjamini and Hochberg (1995).

#### 328 *Bayesian sparse linear mixed models*

329 Models used for joint estimation of additive marker effects were Bayesian sparse linear mixed

330 models (BSLMM) where marker effects are decomposed into a polygenic component and a

331 sparse component (characterizing outstanding effects of few markers). Using Markov chain

332 Monte Carlo (MCMC), the following model was fitted:

333  $\mathbf{y} = \mathbf{1}\mu + \mathbf{X}\tilde{\boldsymbol{\beta}} + \mathbf{X}\boldsymbol{\alpha} + \mathbf{e}; \tilde{\beta}_j \sim \pi N(0, \sigma_{\tilde{\beta}}^2) + (1 - \pi)\delta_0, j = 1, \dots, m; \boldsymbol{\alpha} \sim N(\mathbf{0}, \mathbf{I}\sigma_{\alpha}^2);$

334  $\mathbf{e} \sim N(\mathbf{0}, \mathbf{I}\sigma_e^2)$

335 BSLMMs were fitted in Ames/PHZ51+B47 or NAM/PHZ51 by GEMMA v0.98.1, with  
336 1,000,000 and 10,000,000 MCMC iterations for burn-in and sampling, respectively (Zhou et al.  
337 2013). As part of the MCMC process, a vector  $\boldsymbol{\gamma}$  of posterior inclusion probabilities (PIP) was  
338 generated, such that  $\gamma_j = \Pr(\tilde{\beta}_j \neq 0), j = 1, \dots, m$ . We estimated window posterior inclusion  
339 probability (WPIP) following Guan and Stephens (2011), by summing  $\gamma_j$ 's in 500-kb windows,  
340 sliding by 250-kb steps.

### 341 **Functional polygenic models**

#### 342 *Effects of markers by evolutionary and structural features*

343 Effects of evolutionary and structural features on the amplitude of marker effects were captured  
344 by linear mixed models which partitioned the genomic variance among hybrids by annotation  
345 bin. For each feature (gene proximity, recombination rate, chromatin openness, MAF, and  
346 GERP) the following model was fitted:

347  $\mathbf{y} = \mathbf{Q}\boldsymbol{\delta} + \mathbf{u} + \mathbf{w} + \mathbf{e}; \mathbf{u} \sim N(\mathbf{0}, \sum_k \mathbf{G}_k \sigma_k^2), \mathbf{w} \sim N(\mathbf{0}, \sum_l \mathbf{D}_l \sigma_l^2), \mathbf{e} \sim N(\mathbf{0}, \mathbf{I}\sigma_e^2), \mathbf{G}_k = \frac{\mathbf{X}_k \mathbf{X}_k'}{m_k},$  and

348  $\mathbf{D}_l = \frac{\mathbf{Z}_l \mathbf{Z}_l'}{m_l} \quad (3)$

349 where  $\mathbf{X}_k$  ( $\mathbf{Z}_l$ ) is the matrix of minor-allele counts at the  $m_k$  ( $m_l$ ) SNPs in bin  $k$  ( $l$ ), and  $\sigma_k^2$  ( $\sigma_l^2$ ) is  
350 the variance component associated to additive effects in bin  $k$  (dominance effects in bin  $l$ ). The  
351 significance of the variance partition was assessed by a likelihood ratio test, comparing the  
352 REML of the evaluated model to that of a baseline model. Two types of variance partition were  
353 analyzed by model (3): partition by one feature (baseline: DGBLUP in Ames/PHZ51+B47 and

354 GBLUP in NAM/PHZ51), and partition by both gene proximity and another feature (baseline:  
 355 partition by gene proximity only). Model (3) was fitted in Ames/PHZ51+B47 or NAM/PHZ51,  
 356 by REML using the R package regress v1.3-15 (Clifford and McCullagh 2005).

### 357 *Variance partition and SNP enrichment*

358 For each hybrid  $i$ , the proportion of variance explained by marker effects in GBLUP was  
 359 estimated by  $\frac{\tilde{g}_{ii}\sigma_u^2}{\tilde{g}_{ii}\sigma_u^2 + \sigma_e^2}$ , where  $\tilde{g}_{ii}$  is the  $i^{\text{th}}$  diagonal element of matrix  $\mathbf{G}$  adjusted for fixed effects,  
 360 i.e.,  $\tilde{\mathbf{G}} = (\mathbf{I} - \mathbf{H})\mathbf{G}(\mathbf{I} - \mathbf{H})$ , with  $\mathbf{H} = \mathbf{Q}(\mathbf{Q}'\mathbf{Q})^{-1}\mathbf{Q}'$  being the matrix of projection onto the  
 361 column space of  $\mathbf{Q}$ . The proportion of variance explained by additive marker effects in DGBLUP  
 362 was estimated by  $\frac{\tilde{g}_{ii}\sigma_u^2}{\tilde{g}_{ii}\sigma_u^2 + \tilde{d}_{ii}\sigma_w^2 + \sigma_e^2}$ , and similarly for dominance effects:  $\frac{\tilde{d}_{ii}\sigma_w^2}{\tilde{g}_{ii}\sigma_u^2 + \tilde{d}_{ii}\sigma_w^2 + \sigma_e^2}$  [model (1)].

363 Finally, in functional polygenic models, the proportion of variance explained by additive marker  
 364 effects at bin  $k^*$  was estimated by  $\frac{\tilde{g}_{k^*ii}\sigma_{k^*}^2}{\sum_k \tilde{g}_{kii}\sigma_k^2 + \sum_l \tilde{d}_{l ii}\sigma_l^2 + \sigma_e^2}$ , and similarly for dominance effects at bin

365  $l^*$ :  $\frac{\tilde{d}_{l^*ii}\sigma_{l^*}^2}{\sum_k \tilde{g}_{kii}\sigma_k^2 + \sum_l \tilde{d}_{l ii}\sigma_l^2 + \sigma_e^2}$  [model (3)]. Proportions of variance in whole panels for a given type of

366 effects were then obtained by averaging estimated proportions over hybrids. In functional  
 367 polygenic models, SNP enrichment for additive effects at bin  $k^*$  was calculated by the ratio of

368  $\left[\frac{1}{n} \sum_i \tilde{g}_{k^*ii}\sigma_{k^*}^2\right] / \left[\frac{1}{n} \sum_i (\sum_k \tilde{g}_{kii}\sigma_k^2 + \sum_l \tilde{d}_{l ii}\sigma_l^2)\right]$ , i.e., the proportion of genomic variance

369 explained by bin  $k^*$ , over  $m_{k^*} / [\sum_k m_k + \sum_l m_l]$ , i.e., the proportion of SNPs in bin  $k^*$  (and

370 similarly for dominance effects at bin  $l^*$ ).

### 371 **Validation of prediction models in NAM/PHZ51**

372 Models fitted in Ames/PHZ51+B47 were assessed for prediction accuracy (Pearson correlation  
 373 between observed genotype means and their predicted values) in NAM/PHZ51. Our validation

374 scheme was meant to reflect the merit of prediction models in practical applications of genomic  
375 selection, so prediction accuracies were estimated separately in each NAM/PHZ51 population.  
376 Therefore, prediction accuracy for any prediction model (e.g., DGBLUP) could be tested for  
377 significance of average prediction accuracy (non-zero mean, by a one-sample t-test) and  
378 estimated difference in accuracy compared to another model (non-zero difference, by a two-  
379 sample t-test paired by population) over NAM/PHZ51 populations.

### 380 **Assessment of genotype-by-panel interactions**

381 Interactions between genotypes and panels (environments) were assessed by Pearson correlation  
382 in genotypes means between panels, for hybrids which were common to both panels ( $\rho_c$ ). These  
383 hybrids were derived from crosses between PHZ51 and one of 23 check genotypes (B73, B97,  
384 CML52, CML69, CML103, CML228, CML247, CML277, CML322, CML333, I114H, Ki3,  
385 Ki11, M162W, M37W, Mo17, Mo18W, NC350, NC358, Oh43, P39, Tx303, and Tzi8).

386 Genotype-by-panel interactions were also assessed by the following polygenic model, based on  
387 Jarquín et al. (2014):

$$388 \mathbf{y} = \tilde{\mathbf{Q}}\tilde{\boldsymbol{\delta}} + \tilde{\mathbf{u}} + \mathbf{e}; \tilde{\mathbf{u}} \sim N(\mathbf{0}, \mathbf{G}\sigma_0^2 + [\mathbf{G} \mathbf{E}\mathbf{E}']\sigma_1^2), \mathbf{e} \sim N(\mathbf{0}, \mathbf{I}\sigma_e^2), \mathbf{G} = \mathbf{X}\mathbf{X}'/m$$

389 where  $\mathbf{E}$  was the  $n \times 2$  design matrix attributing genotypes to panels (environments), either  
390 Ames/PHZ51+B47 or NAM/PHZ51;  $\tilde{\mathbf{Q}} = [\mathbf{E} \mathbf{P}]$  and  $\tilde{\boldsymbol{\delta}}$  captured effects of panels and population  
391 structure;  $\tilde{\mathbf{u}}$  were polygenic genomic effects with main variance and panel-specific variance  
392 being quantified by  $\sigma_0^2$  and  $\sigma_1^2$ , respectively;  $\tilde{\mathbf{u}} \tilde{\mathbf{u}}'$  refers to the Hadamard (element-wise) product. For  
393 a given hybrid  $i$ , correlation in  $\tilde{\mathbf{u}}$  between different panel  $j$  and  $j'$  was defined by  $\rho_G =$

$$394 \text{Cor}(\tilde{u}_{ij}, \tilde{u}_{ij'}) = \frac{g_{ii}\sigma_0^2}{g_{ii}(\sigma_0^2 + \sigma_1^2)} = \frac{\sigma_0^2}{\sigma_0^2 + \sigma_1^2} \text{ (Jarquín et al. 2014). This model was fitted in}$$

395 Ames/PHZ51+B47 and NAM/PHZ51, by REML using the R package regress v1.3-15 (Clifford  
396 and McCullagh 2005).

397

398 **RESULTS**

399 **Hybrid panels differed by their genetic diversity and their genetic basis for grain yield**

400 *Hybrid panels displayed contrasting levels of diversity*

401 The genotypic variability in Ames/PHZ51 and Ames/B47 was well represented by the diversity  
402 in the Goodman association panel (Flint-Garcia et al. 2005) (Figure 2). The entire Ames hybrid  
403 panel (Ames/PHZ51+B47) involved hybrids with some affinity to semi-tropical lines (e.g., CML  
404 247) but, for the most part, it comprised hybrids closely related to SS lines like B73 and NSS  
405 lines like Mo17 (Figure 2). Compared to Ames/PHZ51+B47, NAM/PHZ51 was less diverse, as  
406 its genetic composition was relatively consistent (Figure 2). Indeed, NAM/PHZ51 was produced  
407 by crosses between a single NSS tester (PHZ51) and bi-parental populations which were all  
408 derived from a cross involving B73 as a common parent (i.e., NAM RILs are 50% B73).  
409 Moreover, female parents in NAM/PHZ51 were selected for similar flowering time to PHZ51,  
410 hence narrowing down further the genetic diversity in this panel.

411 *Genome-wide patterns across panels were similar for linkage disequilibrium but not for allele*  
412 *frequency*

413 Linkage disequilibrium (LD) patterns were quite similar in both hybrid panels. After adjustment  
414 for population structure and relatedness (following Mangin et al. 2012), LD values were very  
415 concordant between Ames/PHZ51 and Ames/B47 ( $r=0.95$ ), and fairly concordant between  
416 Ames/PHZ51+B47 and NAM/PHZ51 ( $r=0.77$ ) (Figure S1). Average LD values along  
417 chromosomes decayed at similar rates, reaching 0.1 at 160 kb in Ames/PHZ51+B47 and 151 kb  
418 in NAM/PHZ51. However, despite relatively fast LD decay, variance in LD values over SNP  
419 pairs was large (Figure S1). Allele frequencies among female parents were very concordant  
420 between Ames/PHZ51 and Ames/B47 ( $r=0.98$ ), and fairly concordant between

421 Ames/PHZ51+B47 and NAM/PHZ51 ( $r=0.88$ ) (Figure S2). However, for a subset of markers,  
422 frequency spectra were clearly dissimilar, since SNPs at relatively low frequency in  
423 NAM/PHZ51 ( $< 0.5$ ) had frequencies between 0 and 1 in Ames/PHZ51+B47 (Figure S2). Such  
424 differences in allele frequency may result in inconsistencies in genetic effects across panels  
425 because of dominance and epistatic interactions (Mäki-Tanila and Hill 2014).

426 *Genetic bases for grain yield were inconsistent across panels*

427 Three agronomic traits were analyzed for heterosis in Ames/PHZ51+B47 and NAM/PHZ51:  
428 days to silking (DTS), plant height (PH), and grain yield adjusted for differences in flowering  
429 time among hybrids (GY). The relatively low accuracy of genotype means for GY (as reflected  
430 by low broad-sense heritability and entry-mean reliability; Table 1) suggested variability due to  
431 genotype-by-environment interactions. Accordingly, genotypic effects appeared highly  
432 inconsistent for GY between Ames/PHZ51+B47 and NAM/PHZ51 (Table 2). For GY,  
433 correlations across panels based on genotype means of checks ( $\rho_C$ ) and genomic marker effects  
434 ( $\rho_G$ ) were not significantly different from zero ( $p > 0.10$ ; Table 2). In contrast, consistency in  
435 genetic bases was higher for PH ( $\rho_C = 0.65$ ,  $\rho_G = 0.78$ ;  $p < 0.001$ ) and DTS ( $\rho_C = 0.93$ ,  
436  $\rho_G = 1.0$ ;  $p < 0.001$ ) (Table 2). Although  $\rho_G$  may reflect interactions with genetic backgrounds  
437 across panels,  $\rho_C$  merely assessed consistency in the performance of identical checks across  
438 panels, reflecting only differences between environments (locations, years, management  
439 regimens, etc.). Because  $\rho_C$  and  $\rho_G$  were generally concordant, marker-by-panel interactions, as  
440 quantified by both  $\rho_C$  and  $\rho_G$ , likely reflected sensitivity of marker effects to environments.  
441 Therefore, DTS, PH, and GY would represent three distinct levels of sensitivity to genotype-by-  
442 environment interactions, being respectively weak, moderate, and strong.

443

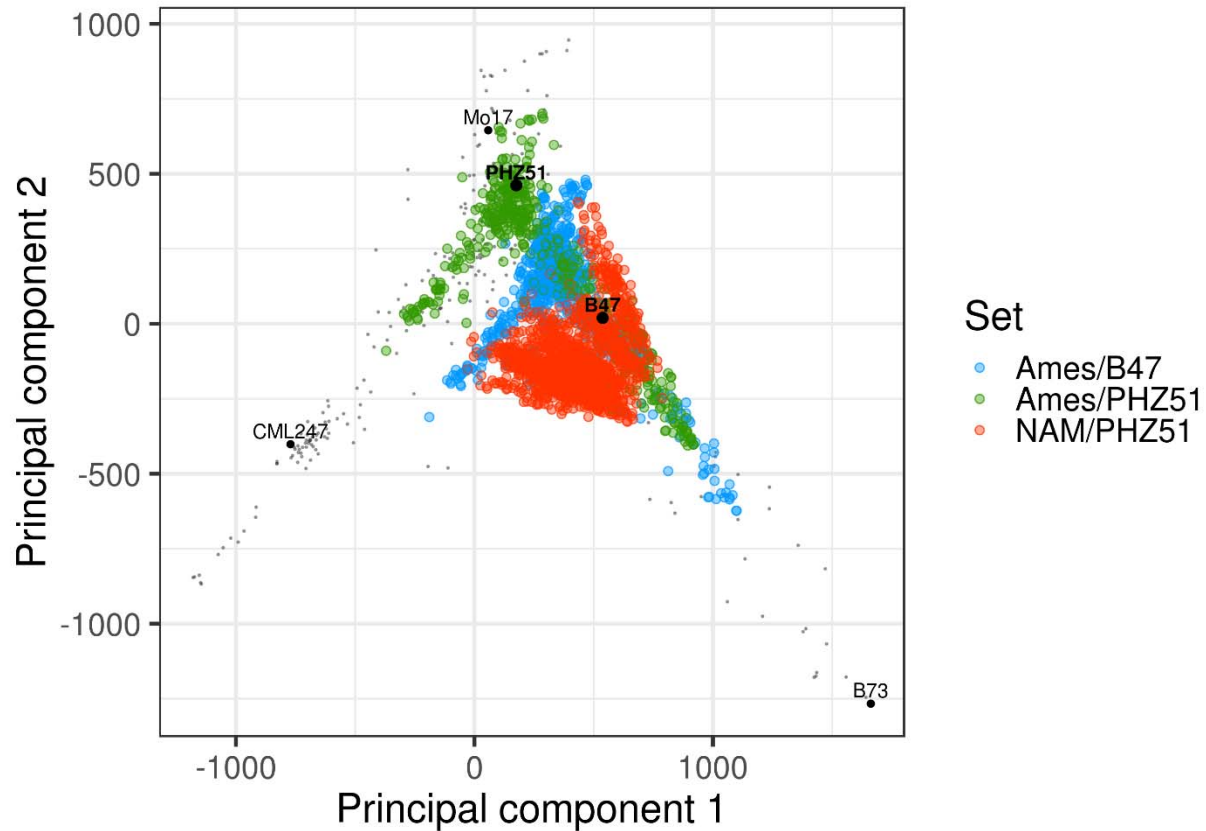

444  
445 **Figure 2 – The two hybrid panels differ by their number of testers and their level of**  
446 **diversity.** Principal component analysis (PCA) plot of hybrids, by set. Black dots refer to inbred  
447 lines in the Goodman association panel (Flint-Garcia et al. 2005), a subset of the Ames panel.  
448 B73: SS reference line; Mo17: NSS reference line; CML247: CIMMYT semi-tropical reference  
449 line.

450



451 **Table 1 – Phenotypic information by panel and trait**

| Panel | Trait | Environments                                    | Mean  | H <sup>2</sup> | r <sub>g</sub> <sup>2</sup> |
|-------|-------|-------------------------------------------------|-------|----------------|-----------------------------|
| Ames  | DTS   | 11IA 11IN 11NC 11NE 11NY 11MO<br>12NC 12NE 12MO | 66.4  | 0.78           | 0.95                        |
|       | PH    | 11IA 11IN 11NC 11NE 11NY 11MO<br>12NC 12NE 12MO | 219   | 0.69           | 0.92                        |
|       | GY    | 11IA 11NC 11NE 11MO<br>12NC 12NE 12MO           | -0.02 | 0.29           | 0.62                        |
| NAM   | DTS   | 10IA 10IN 10MO<br>11IA 11IN 11NC 11NY           | 70.6  | 0.55           | 0.81                        |
|       | PH    | 10IA 10IN 10NC 10MO<br>11IA 11IN 11NC 11NY      | 247   | 0.30           | 0.69                        |
|       | GY    | 10IA 10IN 10MO<br>11IA 11NC                     | -0.20 | 0.16           | 0.35                        |

452 Trait: days to silking (DTS), plant height (PH), grain yield adjusted for DTS (GY). Environments  
 453 refer to year (2010, 2011, 2012) and locations [Kingston (NC), Ames (IA), West Lafayette (IN),  
 454 Lincon (NE), Columbia (MO), and Aurora (NY)]. Mean: average phenotypic value. H<sup>2</sup>: broad-  
 455 sense heritability on a plot basis. r<sub>g</sub><sup>2</sup>: average entry-mean reliability.

456 **Table 2 – Interactions between genotypes and environments/panels**

| Trait | ρ <sub>c</sub> : correlation in checks' genotype means (p-value) | ρ <sub>G</sub> : correlation in genomic effects (p-value) |
|-------|------------------------------------------------------------------|-----------------------------------------------------------|
| DTS   | 0.93 (1.0×10 <sup>-10</sup> )                                    | 1.0 (4.6×10 <sup>-21</sup> )                              |
| PH    | 0.65 (8.2×10 <sup>-4</sup> )                                     | 0.78 (2.9×10 <sup>-8</sup> )                              |
| GY    | 0.34 (0.13)                                                      | 0.30 (0.13)                                               |

457 Trait: days to silking (DTS), plant height (PH), grain yield adjusted for DTS (GY). ρ<sub>c</sub>:  
 458 correlation in estimated genotype means, only for checks, tested in both panels; p-values were  
 459 estimated by t-tests. ρ<sub>G</sub>: correlation in genomic breeding values, based on a polygenic marker-  
 460 by-panel interaction model; p-values were estimated by likelihood ratio tests.

461

462 **Heterosis for plant height and grain yield appeared to be caused by dominance gene action**

463 *Polygenic dominance effects captured genotypic variability for all traits*

464 To assess the general relevance of polygenic dominance effects, genotypic variability captured in  
465 our assay was partitioned into additive and dominance components in a dominance GBLUP  
466 (DGBLUP) model. For all traits, dominance accounted for a significant portion of genotypic  
467 variability in Ames/PHZ51+B47 ( $p \leq 2.2 \times 10^{-11}$ ), capturing 35%, 23%, and 41% of genomic  
468 variance for DTS, PH, and GY (Figure 3a). These estimates corresponded to average degrees of  
469 dominance (ratio of dominance-to-additive standard deviations) of 0.73, 0.54, and 0.83  
470 respectively. Therefore, overdominance did not seem to be pervasive in Ames/PHZ51+B47  
471 (average degrees of dominance lower than one).

472 Genomic relationships for epistatic effects were highly correlated with those for additive  
473 and/or dominance effects (e.g.,  $r > 0.99$  between additive and additive $\times$ additive relationships).  
474 Therefore, we did not assess epistatic effects by partition of genomic variance. Despite this  
475 limitation, we further investigated the plausibility of dominance as a genetic mechanism  
476 underlying heterosis, by using evidence based on oligogenic effects (QTL effects) and  
477 directional effects.

478 *Effects of QTL were significant for days to silking but they did not suggest dominance gene*  
479 *action*

480 Effects of QTL were inferred by GWAS models and Bayesian sparse linear mixed models  
481 (BSLMMs). Signals from GWAS models and BSLMMs were concordant, and revealed multiple  
482 significant QTL effects for DTS (Figure S3). There were five and seven high-confidence QTL  
483 (FDR  $\leq 0.05$  and WPIP  $\geq 0.5$ ) for DTS in Ames/PHZ51+B47 and NAM/PHZ51, respectively

484 (Figure S3, Table S1). For PH and GY, no QTL effects were significant except for one QTL for  
485 GY in NAM/PHZ51 (Table S1).

486 GWAS and BSLMM signals for DTS showed limited consistency between  
487 Ames/PHZ51+B47 and NAM/PHZ51 (Figure S3), with no overlap of high-confidence QTL  
488 across panels (Table S1). This inconsistency could be due to genetic interactions (dominance  
489 and/or epistasis), genotype-by-environment interactions, or differential amount of information  
490 about SNP effects (different levels of power, due to differences in allele frequency and sample  
491 size).

492 To test whether dominance contributed to QTL effects we conducted a GWAS for  
493 additive and dominance QTL effects in Ames/PHZ51+B47. Multiple additive effects appeared  
494 significant for DTS, with significant QTL effects ( $FDR \leq 0.05$ ) in chromosomes 3, 1, and 9  
495 (Figure 3c). But dominance effects were not significant ( $FDR > 0.30$ ) (Figure 3c), so factors  
496 causing the inconsistency in QTL effects for DTS probably did not involve dominance. Besides,  
497 genetic effects did not appear to be sensitive to environments for DTS (Table 2), and there were  
498 no systematic differences in allele frequency that could explain difference in significance of QTL  
499 across panels (Table S1). Thus, it is plausible that higher-order genetic interactions (epistasis)  
500 caused the difference in QTL significance for DTS across panels.

501 *Effects of inbreeding pointed to dominance for plant height and grain yield and higher-order*  
502 *genetic interactions for days to silking*

503 Under directional dominance, inbreeding should be linearly related to fitness, but such  
504 relationship will tend to be nonlinear under higher-order epistatic interactions such as  
505 dominance $\times$ dominance interactions (Crow and Kimura 1970). To test whether dominance  
506 contributed to genotypic variability by directional effects, we assessed linear and quadratic

507 effects of genomic inbreeding ( $F$ ) on agronomic traits. For PH and GY in Ames/PHZ51+B47,  
508 only linear effects of genomic inbreeding were significant (Figure 3b). Moreover, these effects  
509 were on par with their expected impact on fitness, since genomic inbreeding was negatively  
510 associated with PH and GY. For DTS in Ames/PHZ51+B47, only the quadratic effect of  
511 genomic inbreeding was significant (Figure 3b). Such nonlinear effect implied epistatic gene  
512 action for DTS, in the form of SNP×SNP interactions or SNP×background interactions (e.g.,  
513 differential effects of markers in SS, NSS or semi-tropical genotypes). Along with the lack of  
514 dominance QTL effects, the lack of linear effects suggested that dominance is not a predominant  
515 genetic mechanism underlying heterosis for DTS.

516         Despite the high significance of directional effects for all traits in Ames/PHZ51+B47,  
517 similar effects were not significant in NAM/PHZ51 (Table S2), possibly because of lower  
518 variance and lower range of genomic inbreeding values in this panel (Lynch and Walsh 1998). In  
519 fact, variances of  $F$  and  $F^2$  were respectively 3.9 and 58 times smaller in NAM/PHZ51 (where  
520 maximum  $F$  was only 0.15) compared to Ames/PHZ51+B47 where  $F$  could be as high as 0.55,  
521 for hybrids such as B37×B47 (Table S2).

522

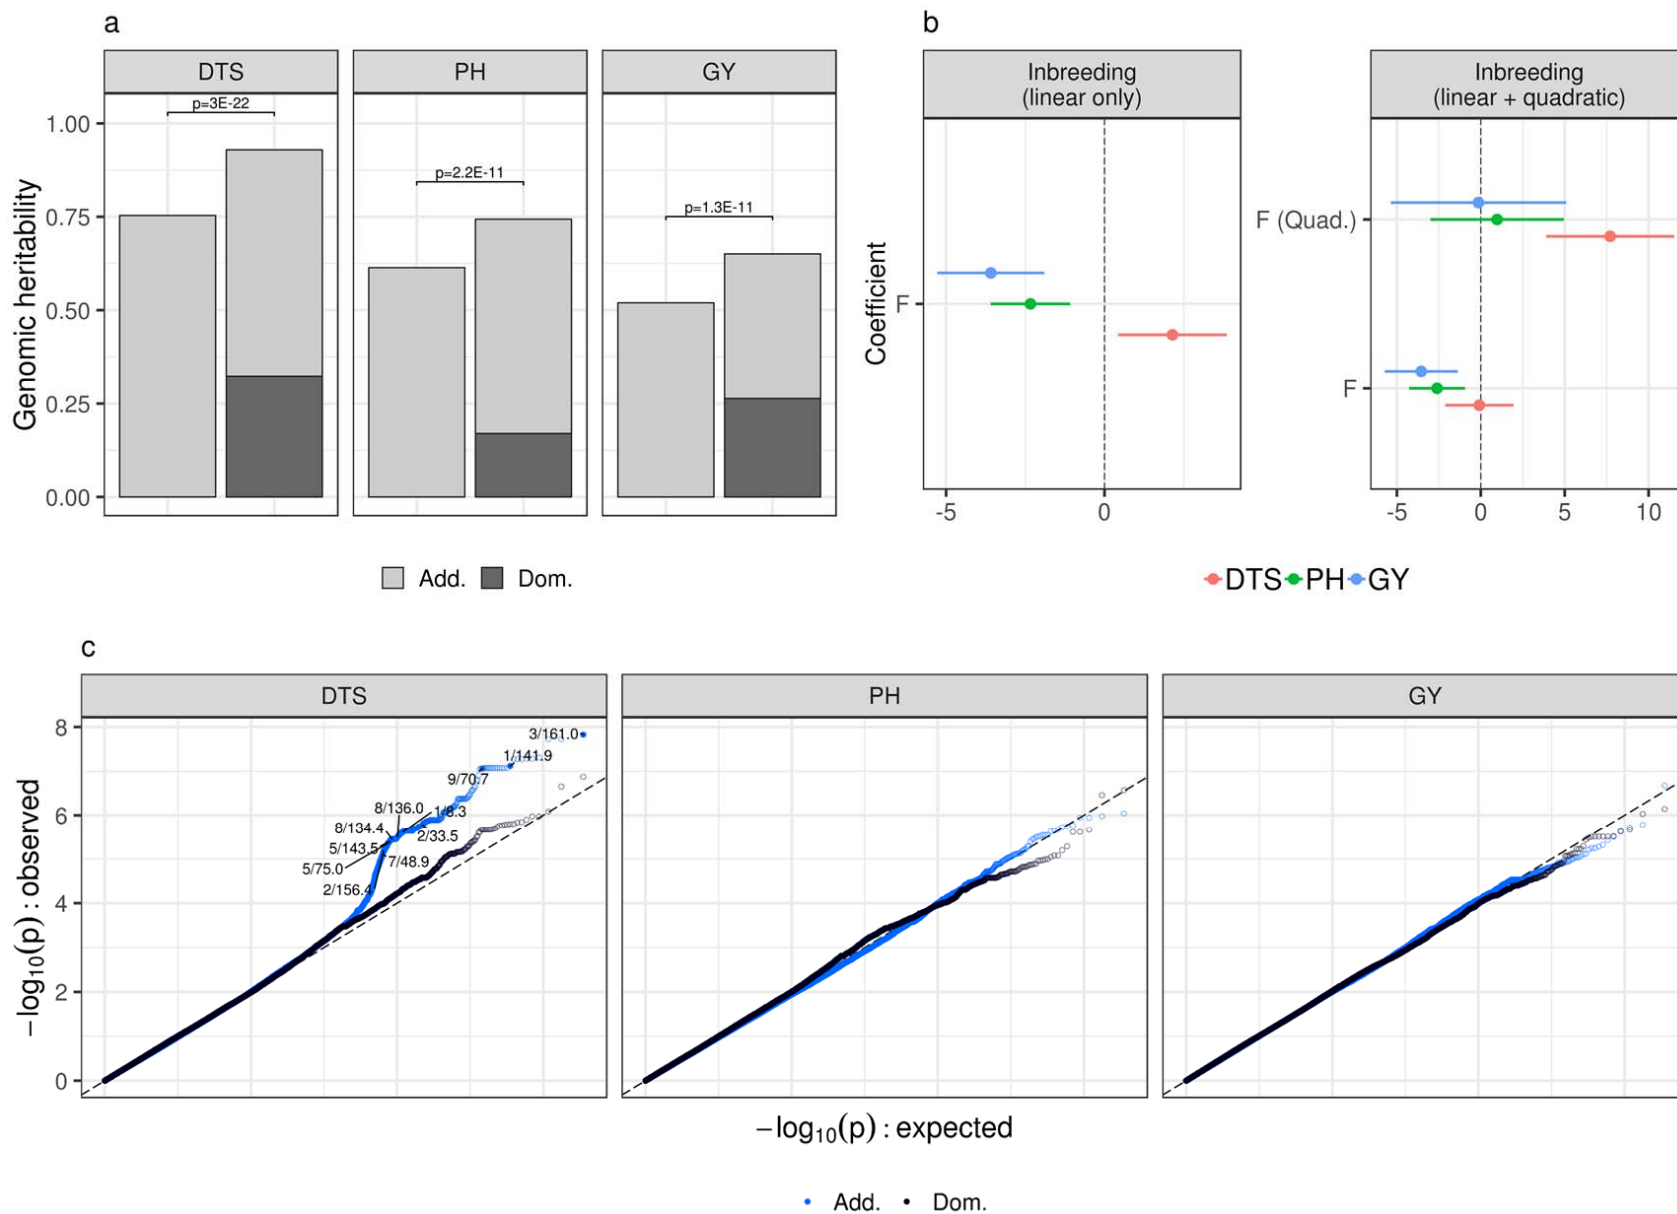

524 **Figure 3 – Dominance gene action is a plausible mechanism on hybrid vigor for plant height (PH) and grain yield (GY), but**  
525 **not for days to silking (DTS), in Ames/PHZ51+B47.** (a) Partition of variance by additive and dominance effects in genome-wide  
526 polygenic models; genomic heritability: proportion of variance among genotype means captured by additive (Add.) or dominance  
527 (Dom.) marker effects; p: p-values from likelihood ratio tests. (b) Estimated effects of genomic inbreeding (point and 95% confidence  
528 interval). Effects are shown in unit of standard deviations for each trait. F: linear effect; F (Quad.): quadratic effect. (c) Quantile-  
529 quantile plot for joint estimates of additive effects ('Add.') and dominance effects ('Dom.'). Effects of SNPs were deemed significant  
530 if their false discovery rate (FDR) was lower than 0.05 and if they were not within 1 Mb of SNPs of more significant effects (effects  
531 with lower p-values). SNPs with significant effects are designated by chromosome number and genomic position in Mb.  
532

533 **Heterosis for all traits may be caused by complementation in proximal gene regions**

534 *Polygenic effects were enriched in genic regions for all traits*

535 Partition of genomic variance by proximity to annotated genes was significant for all traits in  
536 Ames/PHZ51+B47 and NAM/PHZ51, based on likelihood ratio tests combined by Fisher's  
537 method ( $p < 0.01$ ; Table S3; Figure 4a). As suggested by the high correlation in significance ( $-\log_{10}(p)$ ) between Ames/PHZ51+B47 and NAM/PHZ51 ( $r=0.92$ ), the higher significance of  
538 partitions in NAM/PHZ51 could be due to a systematic increase in statistical power, due in part  
539 to the larger sample size in NAM/PHZ51 ( $n=1640$  vs.  $n=1106$ ).

541 Observed SNP enrichments by gene-proximity classes were concordant across panels and  
542 traits; they indicated that the magnitude of polygenic effects tended to be higher near genic  
543 regions (Figure 4b). Moreover, the proportion of variance explained by gene-proximal SNPs was  
544 consistently larger than explained by gene-distal SNPs, except for additive effects in non-genic  
545 regions for DTS in Ames/PHZ51+B47 (43% of genomic variance in non-genic regions vs. 22%  
546 in genic regions; Table S4). Therefore, there was supporting evidence for genotypic variability  
547 arising through genetic effects in genic regions, especially for PH for which enrichment near  
548 annotated genes was highly significant in both panels.

549 *Enrichment of polygenic effects in low-recombination regions and evolutionarily constrained*  
550 *loci was unclear*

551 Partition of genomic variance explained by recombination rate, chromatin openness, MAF, and  
552 GERP scores was significant for DTS in NAM/PHZ51 only (all features), for PH in both panels  
553 (all features except MAF), and for GY in NAM/PHZ51 only (all features except MAF) (Figure  
554 4a, Table S3). SNP enrichments in both panels indicated that the magnitudes of polygenic effects  
555 tended to be larger at low-diversity loci (low MAF and high GERP scores) and in euchromatic

556 regions (open chromatin and moderate-to-high recombination rates) (Figure S4). However, none  
557 of them were significant after accounting for gene proximity, based on likelihood ratio tests  
558 combined by Fisher's method ( $p > 0.01$ ; Table S3). Because evolutionary constraint and  
559 chromatin structure are positively associated with gene density, enrichment at these features may  
560 have been due to SNP enrichment by gene proximity.  
561



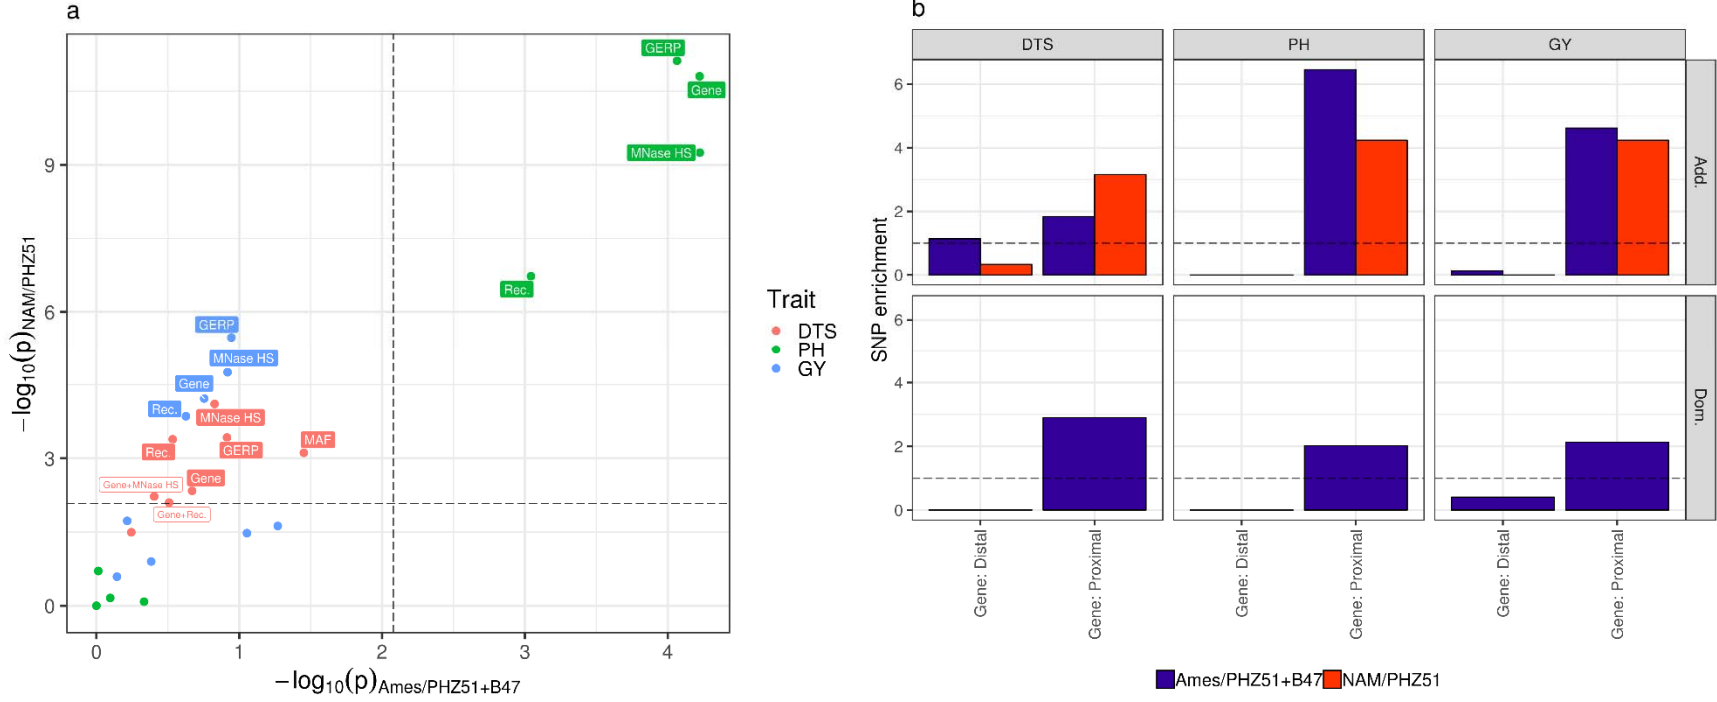

562

563 **Figure 4 – Effects of SNPs on hybrid vigor are enriched in proximal gene regions for days to silking (DTS), plant height (PH)**  
 564 **and grain yield (GY), in Ames/PHZ51+B47 and NAM/PHZ51.** (a) Significance of variance partition by gene proximity (Gene),  
 565 structural features (Rec., MNase HS) or evolutionary features (MAF, GERP), and variance partition after accounting for gene  
 566 proximity (Gene+Rec., Gene+MNase HS, Gene+MAF, Gene+GERP); p-values were obtained by likelihood ratio test comparing the  
 567 functional model to a baseline model with no partition for the feature of interest (e.g. Gene vs. unpartitioned model, Gene+MAF vs.  
 568 Gene); dashed lines correspond to thresholds for significance in either panel, after adjustment by Bonferroni correction. Text refers to

569 significant features after Bonferroni correction, based on p-values in either panel (open boxes) or p-values in both panels combined by  
570 Fisher's method (full boxes) (Table S3). (b) Enrichment of SNP heritability, for additive effects (Add.) and dominance effects (Dom.),  
571 by bin for gene proximity (Gene). Proximal:  $\leq 1$  kb of an annotated gene; Distal:  $> 1$  kb from an annotated gene.

572

573 **Genomic prediction models were improved by dominance effects and functional features**

574 *Polygenic dominance effects increased prediction accuracy for plant height*

575 Predictions from GBLUP models trained in Ames/PHZ51+B47 were significantly accurate in  
576 NAM/PHZ51 (prediction accuracy significantly different from zero) for DTS and PH, but not for  
577 GY (Table 3). The absence of predictive ability for GY may be explained by very strong  
578 genotype-by-environment interactions (Table 2). Prediction accuracy was highest for DTS,  
579 consistently with genomic heritability in Ames/PHZ51+B47 being the highest (Figure 3a) and  
580 genetic effects being the most concordant across panels (Table 2). Predictions from DGBLUP  
581 models trained in Ames/PHZ51+B47 and tested in NAM/PHZ51 were significantly more  
582 accurate than GBLUP for PH ( $p = 0.021$ ), with no significant differences in accuracy for DTS  
583 and GY (Table 3). Therefore, accounting for polygenic dominance effects should not be  
584 detrimental to genomic prediction models (despite the higher complexity of DGBLUP compared  
585 to GBLUP) and may even increase their accuracy.

586 QTL effects, as estimated from BSLMMs (sparse effects), generated predictions that  
587 were significantly accurate in NAM/PHZ51 for DTS (Table S5). Predictions from sparse effects  
588 were also significantly accurate for PH, but they actually recapitulated polygenic effects, since  
589 their predictions were highly correlated to those from a purely polygenic model (RR-BLUP) ( $r =$   
590  $0.87$  for PH vs.  $r = 0.63$  for DTS; Figure S6). Despite QTL effects being highly significant for  
591 DTS, a BSLMM simultaneously fitting sparse and polygenic effects did not result in significant  
592 gains in prediction accuracy for any trait, compared to RR-BLUP. Therefore, even when QTL  
593 effects could capture a significant part of the genotypic variability, they did not seem useful for  
594 genomic prediction. Likewise, directional effects (genomic inbreeding) explained a significant  
595 part of genotypic variability in Ames/PHZ51+B47 (Figure 3b, Table S2), but incorporating them

596 into DGBLUP models resulted in small and non-significant differences in prediction accuracy in  
597 NAM/PHZ51 populations (Table S6).

598 *Partition of polygenic effects by gene proximity increased prediction accuracy for all traits*

599 The amplitude of polygenic effects was inflated near annotated genes in both panels for all traits  
600 (Figure 4b). Accordingly, partitioning genomic variance by gene proximity increased prediction  
601 accuracy for DTS ( $p = 3.3 \times 10^{-4}$ ), PH ( $p = 0.023$ ), and GY ( $p = 0.085$ ), compared to a DGBLUP  
602 model (Table 4).

603 Other features than gene proximity also resulted in significant gains in prediction  
604 accuracy. Partitioning genomic variance by recombination-rate classes increased prediction  
605 accuracy for GY (Table 4); besides, recombination rate and GERP scores contributed to  
606 improvements that were significant, but only when enrichment by gene proximity was omitted  
607 from prediction models for DTS (Table 4). Even when classes based on MNase HS and GERP  
608 scores did not yield significant gains in prediction accuracy, the high SNP enrichments achieved  
609 by these features (~32-fold for open-chromatin regions and ~8-fold for GERP > 0) could be of  
610 practical interest for SNP selection in prediction analyses (Figure S4, Table 4). Therefore,  
611 although gene proximity appeared most useful and meaningful in our study, the value of  
612 structural and evolutionary features for genomic prediction would deserve further investigation.

613 **Table 3 – Prediction accuracy in NAM/PHZ51 by polygenic dominance effects in**  
 614 **Ames/PHZ51+B47**

| Trait      | Prediction accuracy (p-value) | Difference in prediction accuracy (p-value) |
|------------|-------------------------------|---------------------------------------------|
|            | GBLUP                         | Dominance GBLUP                             |
| <b>DTS</b> | 0.331 (< 0.001)               | -0.013 (0.21)                               |
| <b>PH</b>  | 0.235 (< 0.001)               | +0.023 (0.021)                              |
| <b>GY</b>  | -0.001 (0.96)                 | -0.010 (0.33)                               |

615 Prediction accuracy: average correlation between observed and predicted phenotypes in  
 616 NAM/PHZ51 over 24 populations by the GBLUP model; Difference in prediction accuracy:  
 617 difference between the dominance GBLUP (DGBLUP) model and the GBLUP model.  
 618 Significance of average prediction accuracies (non-zero mean) and estimated differences in  
 619 prediction accuracy (non-zero difference) was assessed by t-tests paired by NAM population.

620 **Table 4 – Prediction accuracy in NAM/PHZ51 by functional features in Ames/PHZ51+B47**

| Trait      | Prediction accuracy |                | Difference in prediction accuracy |                |           |            |
|------------|---------------------|----------------|-----------------------------------|----------------|-----------|------------|
|            | Dominance GBLUP     | Gene proximity | Rec.                              | MNase HS       | MAF       | GERP       |
| <b>DTS</b> | 0.319***            | +0.013***      | +0.019*                           | +0.007         | -0.012    | +0.012*    |
| <b>PH</b>  | 0.259***            | +0.029*        | +0.007                            | +0.019         | +0.001    | +0.019     |
| <b>GY</b>  | -0.011              | +0.010         | +0.025**                          | +0.012         | -0.007    | +0.010     |
|            | Gene proximity      | Gene proximity | Rec. +Gene                        | MNase HS +Gene | MAF +Gene | GERP +Gene |
| <b>DTS</b> | 0.332***            | –              | +0.011                            | +0.001         | N/A       | -0.001     |
| <b>PH</b>  | 0.288***            | –              | N/A                               | -0.002         | 0.000     | -0.006     |
| <b>GY</b>  | -0.001              | –              | +0.014*                           | +0.003         | 0.000     | 0.000      |

621 Prediction accuracy: average correlation between observed and predicted phenotypes in  
 622 NAM/PHZ51 by the dominance GBLUP (DGBLUP) model; Difference in prediction accuracy:  
 623 difference between a given model and the DGBLUP model (top) or polygenic functional model  
 624 by gene proximity (bottom). Gene proximity: proximity to genes ( $\leq$  1 kb of an annotated gene);  
 625 Rec.: recombination rate; MNase HS: chromatin openness; MAF: minor allele frequency; GERP:

626 genomic evolutionary rate profiling score. Significance of average prediction accuracies (non-  
627 zero mean) and estimated differences in prediction accuracy (non-zero difference) was assessed  
628 by t-tests, paired by NAM population (\*, \*\*, \*\*\*: p-values below 0.05, 0.01, and 0.001,  
629 respectively). N/A: the fitting algorithm could not converge to a solution.

630

## 631 **DISCUSSION**

### 632 **Do additive and dominance gene actions adequately capture true genetic effects?**

633 All traits displayed a significant proportion of variance explained by dominance effects (Figure  
634 3a). However for DTS, there was conflicting evidence about the importance of dominance: (i) no  
635 significant dominance QTL effects despite significant additive QTL effects (Figure 3c) and (ii)  
636 significant quadratic effects of genomic inbreeding, without any linear effect (Figure 3b). Such  
637 evidence indicates that DTS should probably be analyzed under more complex genetic models  
638 involving epistatic interactions, possibly reflecting the complex molecular pathways underlying  
639 flowering time (e.g., photoperiod genes; Yang et al. 2013, Blümel et al. 2015, Minow et al.  
640 2018). In this study, genomic variance in Ames/PHZ51+B47 could not be partitioned reliably by  
641 additive, dominance, and epistatic effects. Indeed, genomic relationships for pairwise epistatic  
642 effects were highly correlated with those for additive effects. Moreover, epistatic effects in linear  
643 mixed models vary depending on how marker variables are centered, in a way that can be  
644 arbitrary (Martini et al. 2016, Martini et al. 2017). However, further analyses to investigate the  
645 contribution of epistatic effects to genomic variance is merited (Jiang and Reif 2015).  
646 Investigating epistatic effects would probably require large panels with more testers (male  
647 parents), but also efficient methodologies to restrict the number of interactions (e.g., only  
648 interactions between homeologs; Santantonio et al. 2018) and the types of effects involved (e.g.,  
649 only SNP×SNP interactions such as additive×additive effects, or SNP×background interactions  
650 such as SNP×PC effects; Ramstein et al. 2018).

651 For PH and GY, there was concordant evidence for prevalent dominance effects: (i)  
652 significant variance partition by dominance effects (Figure 3a) and (ii) a significant linear effect  
653 of genomic inbreeding, without any quadratic effect (Figure 3b). Therefore, additive and

654 dominance effects may parsimoniously capture genetic effects for PH and GY. These results  
655 contrast with those from previous studies on hybrid maize, which showed low contribution of  
656 non-additive genetic effects to genotypic variability. Critically, those studies were based on  
657 panels derived solely from crosses between different heterotic groups, e.g., Flint×Dent (Technow  
658 et al. 2014, Giraud et al. 2017) or SS×NSS (Kadam et al. 2016). Therefore, complementation  
659 effects were relatively consistent across hybrids, such that variability for specific combining  
660 ability (contributed by dominance and/or epistasis) was low. In contrast, one of our panels  
661 (Ames/PHZ51+B47) showed strong variation for complementation effects, because it represents  
662 a variety of genetic contexts (SS×NSS, SS×SS, Semi-tropical×SS, etc.). Therefore, it was better-  
663 suited to represent the differential levels of complementation effects in maize and reveal the  
664 importance of dominance across maize hybrids.

#### 665 **What is the biological basis for enrichment of SNP effects by gene proximity?**

666 Analyses of SNP enrichment pointed to genetic effects arising mostly from genic regions  
667 (proximal SNPs,  $\leq 1$  kb from annotated genes). The relevance of genic regions for depicting  
668 hybrid vigor is consistent with hypotheses about biological causes of heterosis related to gene  
669 expression, namely, (i) non-additive inheritance of gene expression and (ii) nonlinear effects of  
670 gene expression on agronomic traits (Springer and Stupar 2007, Schnable and Springer 2013). In  
671 maize, studies have generally reported that most genes have an additive mode of inheritance for  
672 expression levels (e.g., Swanson-Wagner et al. 2006, Stupar and Springer 2006, Zhou et al.  
673 2018), with proportions of non-additive gene actions ranging from ~10% (Paschold et al. 2012)  
674 to ~35% (Marcon et al. 2017). Proposed mechanisms for non-additive gene expression include  
675 complementation with respect to regulatory motifs or transcription factors, and presence/absence  
676 variation (Paschold et al. 2012, Marcon et al. 2017, Zhou et al. 2018). Importantly, studies on



677 gene expression in maize have also suggested that non-additive gene expression may not account  
678 entirely for heterosis (Swanson-Wagner et al. 2006, Stupar and Springer 2006). Therefore, the  
679 genome-wide patterns of apparent dominance at gene regions observed here (Figure 4b) might  
680 have also emerged from nonlinear effects of gene expression on agronomic traits. Evidence for  
681 this type of effects in maize include intermediate gene expression harboring minimal burden of  
682 deleterious mutations in diverse maize inbred lines (Kremling et al. 2018) and biological results  
683 in support for the gene balance hypothesis (Birchler and Veitia 2010), which postulates that  
684 genes that are highly connected (in pathways, protein complexes, etc.) should be expressed in  
685 relative amounts under a stoichiometric optimum (Birchler et al. 2001). Optimal expression  
686 levels under gene balance constitute nonlinear effects of gene expression, and may contribute to  
687 non-additive genetic effects (Birchler and Veitia 2010). Ideally, future research about the  
688 biological basis for enrichment of SNP effects in genic regions will involve gene expression data  
689 in diverse hybrid panels, and will shed light onto the relative importance of such phenomena on  
690 heterosis.

691         The hybrid panels under assay were relatively large, so that we could gain useful insight  
692 about SNP enrichments by functional classes. However, some biological and genetic hypotheses  
693 could not be tested due to limited power and resolution in our analyses. For example, we could  
694 not account for enrichment in genic regions and concurrently assess the functional importance of  
695 evolutionary constraint or repulsion phase linkage. Moreover, because of high correlation  
696 between genomic relationships from different bins ( $r > 0.99$ ), we did not consider finer partitions  
697 for different levels of deleteriousness (more than two GERP-score classes; Wang et al. 2017) or  
698 relevance of chromatin openness at different tissues (root and/or shoot; Rodgers-Melnick et al.

699 2016). Therefore, larger sample sizes will be critical to investigate finer partitions in functional  
700 models, allowing higher resolution and better control of confounding factors like gene density.

### 701 **Are enrichments in genic regions and dominance effects useful for genomic selection?**

702 The practical relevance of dominance effects and SNP enrichments were evaluated here by  
703 genomic prediction in each NAM/PHZ51 population, based on models trained in a different  
704 panel (Ames/PHZ51+B47). Therefore, prediction models were assessed for their ability to  
705 sustain accuracy across distinct population backgrounds. Enrichment of SNP effects increase the  
706 representation of loci that are more likely to be causal; therefore, enrichment procedures like  
707 QTL detection or variance partition can improve the accuracy of genomic prediction models.  
708 However, as genetic effects vary from one population background to another, enrichments about  
709 small functional classes (e.g., a few GWAS hits) lose their potential. This caveat was  
710 exemplified by differences in QTL effects for DTS between Ames/PHZ51+B47 and  
711 NAM/PHZ51, and the consequent lack of gain in accuracy by prediction models based on QTL  
712 effects (BSLMMs) (Table S5). Similarly, Spindel et al. (2016) showed benefits of major QTL  
713 effects for prediction of flowering time in rice, but only when QTL were detected on the target  
714 breeding populations. Contrary to enrichments about QTL, enrichments about larger functional  
715 classes (e.g., gene-proximal SNPs) should result in gains of prediction accuracy that are robust to  
716 differences in population backgrounds and consistent over traits, as was observed here (Table 4).  
717 Likewise, Gao et al. (2017) reported gains in genomic prediction accuracy by prioritizing genic  
718 SNPs, in mouse, drosophila, and rice (increases in predictive ability averaging +0.013, similar to  
719 those realized in this study). Therefore, gains in prediction accuracy by gene proximity should be  
720 expected under a broad range of population and species contexts.

721           While SNP enrichments by gene proximity appeared beneficial for all traits,  
722 incorporating dominance resulted in gains in prediction accuracy for PH only (Table 3). The  
723 absence of gain in prediction accuracy for DTS and GY illustrates possible reasons for  
724 disagreement between quality of fit and prediction accuracy often observed in genomic  
725 prediction studies. For DTS, incorporating dominance effects resulted in *statistically* significant  
726 improvements in fit, but a genetic model accounting for epistatic interactions appeared more  
727 plausible according to analyses of QTL and genomic inbreeding. Therefore, the choice of the  
728 prediction procedure should probably come from multiple pieces of evidence in favor of a given  
729 genetic model, rather than a single statistical test about the prediction model. In the case of GY, a  
730 genetic model based only on additive and dominance effects seemed plausible in  
731 Ames/PHZ51+B47, but the dependency of these effects on environmental backgrounds hindered  
732 predictions in NAM/PHZ51. Therefore, prediction of hybrid performance for GY should  
733 probably accommodate genotype-by-environment interactions, through models based on  
734 environmental covariates related to temperature, radiation, or soil water potential (Li et al. 2018,  
735 Millet et al. 2019).

## 736 **Conclusions**

737           Our analyses point to genetic models in hybrid maize which involve interactive effects  
738 and emphasize genic regions. While dominance may be relevant to all three traits, epistasis  
739 seemed particularly important for DTS, and interactions with environments seemed critical for  
740 GY. Consequently, genomic prediction models were improved by dominance effects for PH  
741 only, while they benefited from SNP enrichment in genic regions for all traits. These results call  
742 for further investigation about the biological basis of genetic complementation, and the  
743 underlying interactive effects which could enable more robust prediction of hybrid vigor.

744 **ACKNOWLEDGEMENTS**

745 This work was funded by NSF Plant Genome Program (IOS 0820619 and 1238014) and USDA-  
746 ARS. Graduate work of SJL, work of ESE, and IA10 trials were partially funded by Syngenta.

747 **REFERENCES**

748 Baglama J., and L. Reichel, 2005 Augmented Implicitly Restarted Lanczos Bidiagonalization  
749 Methods. SIAM J. Sci. Comput. 27: 19–42.

750 Bates D., D. Eddelbuettel, and Others, 2013 Fast and elegant numerical linear algebra using the  
751 RcppEigen package. J. Stat. Softw. 52: 1–24.

752 Beissinger T. M., L. Wang, K. Crosby, A. Durvasula, M. B. Hufford, *et al.*, 2016 Recent  
753 demography drives changes in linked selection across the maize genome. Nat Plants 2: 16084.

754 Benjamini Y., and Y. Hochberg, 1995 Controlling the False Discovery Rate: A Practical and  
755 Powerful Approach to Multiple Testing. J. R. Stat. Soc. Series B Stat. Methodol. 57: 289–300.

756 Birchler J. A., U. Bhadra, M. P. Bhadra, and D. L. Auger, 2001 Dosage-dependent gene  
757 regulation in multicellular eukaryotes: implications for dosage compensation, aneuploid  
758 syndromes, and quantitative traits. Dev. Biol. 234: 275–288.

759 Birchler J. A., and R. A. Veitia, 2010 The gene balance hypothesis: implications for gene  
760 regulation, quantitative traits and evolution. New Phytol. 186: 54–62.

761 Blümel M., N. Dally, and C. Jung, 2015 Flowering time regulation in crops—what did we learn  
762 from Arabidopsis? Curr. Opin. Biotechnol. 32: 121–129.

763 Bradbury P. J., Z. Zhang, D. E. Kroon, T. M. Casstevens, Y. Ramdoss, *et al.*, 2007 TASSEL:  
764 software for association mapping of complex traits in diverse samples. Bioinformatics 23: 2633–  
765 2635.

766 Browning B. L., and S. R. Browning, 2009 A unified approach to genotype imputation and

767 haplotype-phase inference for large data sets of trios and unrelated individuals. *Am. J. Hum.*  
768 *Genet.* 84: 210–223.

769 Browning B. L., Y. Zhou, and S. R. Browning, 2018 A One-Penny Imputed Genome from Next-  
770 Generation Reference Panels. *Am. J. Hum. Genet.* 103: 338–348.

771 Bukowski R., X. Guo, Y. Lu, C. Zou, B. He, *et al.*, 2018 Construction of the third-generation  
772 *Zea mays* haplotype map. *Gigascience* 7: 1–12.

773 Butler D. G., B. R. Cullis, A. R. Gilmour, and B. J. Gogel, 2009 ASReml-R reference manual.  
774 The State of Queensland, Department of Primary Industries and Fisheries, Brisbane.

775 Clifford D., and P. McCullagh, 2005 The regress function. *The Newsletter of the R Project*  
776 *Volume 6/2, May 2006* 39243: 6.

777 Cockerham C. C., and Z. B. Zeng, 1996 Design III with marker loci. *Genetics* 143: 1437–1456.

778 Crow J. F., 1948 Alternative Hypotheses of Hybrid Vigor. *Genetics* 33: 477–487.

779 Crow J. F., M. Kimura, and Others, 1970 An introduction to population genetics theory. An  
780 introduction to population genetics theory.

781 Crow J. F., 1998 90 years ago: the beginning of hybrid maize. *Genetics* 148: 923–928.

782 Davydov E. V., D. L. Goode, M. Sirota, G. M. Cooper, A. Sidow, *et al.*, 2010 Identifying a high  
783 fraction of the human genome to be under selective constraint using GERP++. *PLoS Comput.*  
784 *Biol.* 6: e1001025.

785 East E. M., 1936 Heterosis. *Genetics* 21: 375–397.

786 Endelman J. B., and J.-L. Jannink, 2012 Shrinkage estimation of the realized relationship matrix.  
787 *G3* 2: 1405–1413.

788 Evans L. M., R. Tahmasbi, S. I. Vrieze, G. R. Abecasis, S. Das, *et al.*, 2018 Comparison of  
789 methods that use whole genome data to estimate the heritability and genetic architecture of

790 complex traits. *Nat. Genet.* 50: 737–745.

791 Falconer D. S., and T. F. C. Mackay, 1996 *Introduction to quantitative genetics*. Harlow, Essex,  
792 UK: Longmans Green 3.

793 Flint-Garcia S. A., A.-C. Thuillet, J. Yu, G. Pressoir, S. M. Romero, *et al.*, 2005 Maize  
794 association population: a high-resolution platform for quantitative trait locus dissection. *Plant J.*  
795 44: 1054–1064.

796 Frascaroli E., M. A. Canè, P. Landi, G. Pea, L. Gianfranceschi, *et al.*, 2007 Classical genetic and  
797 quantitative trait loci analyses of heterosis in a maize hybrid between two elite inbred lines.  
798 *Genetics* 176: 625–644.

799 Gao N., J. W. R. Martini, Z. Zhang, X. Yuan, H. Zhang, *et al.*, 2017 Incorporating Gene  
800 Annotation into Genomic Prediction of Complex Phenotypes. *Genetics* 207: 489–501.

801 Gardner C. O., 1963 Estimates of genetic parameters in cross-fertilizing plants and their  
802 implications in plant breeding. *Statistical genetics and plant breeding* 982: 225–252.

803 Gerke J. P., J. W. Edwards, K. E. Guill, J. Ross-Ibarra, and M. D. McMullen, 2015 The Genomic  
804 Impacts of Drift and Selection for Hybrid Performance in Maize. *Genetics* 201: 1201–1211.

805 Giraud H., C. Bauland, M. Falque, D. Madur, V. Combes, *et al.*, 2017 Reciprocal Genetics:  
806 Identifying QTL for General and Specific Combining Abilities in Hybrids Between  
807 Multiparental Populations from Two Maize (*Zea mays* L.) Heterotic Groups. *Genetics* 207:  
808 1167–1180.

809 Glaubitz J. C., T. M. Casstevens, F. Lu, J. Harriman, R. J. Elshire, *et al.*, 2014 TASSEL-GBS: a  
810 high capacity genotyping by sequencing analysis pipeline. *PLoS One* 9: e90346.

811 Graham G. I., D. W. Wolff, and C. W. Stuber, 1997 Characterization of a Yield Quantitative  
812 Trait Locus on Chromosome Five of Maize by Fine Mapping. *Crop Sci.* 37: 1601–1610.

813 Guan Y., and M. Stephens, 2011 Bayesian variable selection regression for genome-wide  
814 association studies and other large-scale problems. *Ann. Appl. Stat.* 5: 1780–1815.

815 Hill W. G., and A. Robertson, 1966 The effect of linkage on limits to artificial selection. *Genet.*  
816 *Res.* 8: 269–294.

817 Hinze L. L., and K. R. Lamkey, 2003 Absence of epistasis for grain yield in elite maize hybrids.  
818 *Crop Sci.* 43: 46–56.

819 Jarquín D., J. Crossa, X. Lacaze, P. Du Cheyron, J. Daucourt, *et al.*, 2014 A reaction norm model  
820 for genomic selection using high-dimensional genomic and environmental data. *Theor. Appl.*  
821 *Genet.* 127: 595–607.

822 Jiang Y., and J. C. Reif, 2015 Modelling Epistasis in Genomic Selection. *Genetics*  
823 *genetics.115.177907.*

824 Kadam D. C., S. M. Potts, M. O. Bohn, A. E. Lipka, and A. J. Lorenz, 2016 Genomic Prediction  
825 of Single Crosses in the Early Stages of a Maize Hybrid Breeding Pipeline. *G3* 6: 3443–3453.

826 Kang H. M., J. H. Sul, S. K. Service, N. A. Zaitlen, S.-Y. Kong, *et al.*, 2010 Variance component  
827 model to account for sample structure in genome-wide association studies. *Nat. Genet.* 42: 348–  
828 354.

829 Kremling K. A. G., S.-Y. Chen, M.-H. Su, N. K. Lepak, M. C. Romay, *et al.*, 2018  
830 Dysregulation of expression correlates with rare-allele burden and fitness loss in maize. *Nature*  
831 555: 520–523.

832 Larièpe A., B. Mangin, S. Jasson, V. Combes, F. Dumas, *et al.*, 2012 The genetic basis of  
833 heterosis: multiparental quantitative trait loci mapping reveals contrasted levels of apparent  
834 overdominance among traits of agronomical interest in maize (*Zea mays* L.). *Genetics* 190: 795–  
835 811.

- 836 Larsson S. J., J. A. Peiffer, J. W. Edwards, E. S. Ersoz, S. A. Flint-Garcia, *et al.*, 2017 Genetic  
837 Analysis of Lodging in Diverse Maize Hybrids. *bioRxiv* 185769.
- 838 Lee S., G. R. Abecasis, M. Boehnke, and X. Lin, 2014 Rare-variant association analysis: study  
839 designs and statistical tests. *Am. J. Hum. Genet.* 95: 5–23.
- 840 Li X., T. Guo, Q. Mu, X. Li, and J. Yu, 2018 Genomic and environmental determinants and their  
841 interplay underlying phenotypic plasticity. *Proc. Natl. Acad. Sci. U. S. A.* 115: 6679–6684.
- 842 Lynch M., and B. Walsh, 1998 Genetics and analysis of quantitative traits. Sinauer Assocs. Inc. ,  
843 Sunderland, MA 980.
- 844 Ma X. Q., J. H. Tang, W. T. Teng, J. B. Yan, Y. J. Meng, *et al.*, 2007 Epistatic interaction is an  
845 important genetic basis of grain yield and its components in maize. *Mol. Breed.* 20: 41–51.
- 846 Mäki-Tanila A., and W. G. Hill, 2014 Influence of gene interaction on complex trait variation  
847 with multilocus models. *Genetics* 198: 355–367.
- 848 Mangin B., A. Siberchicot, S. Nicolas, A. Doligez, P. This, *et al.*, 2012 Novel measures of  
849 linkage disequilibrium that correct the bias due to population structure and relatedness. *Heredity*  
850 108: 285–291.
- 851 Marcon C., A. Paschold, W. A. Malik, A. Lithio, J. A. Baldauf, *et al.*, 2017 Stability of Single-  
852 Parent Gene Expression Complementation in Maize Hybrids upon Water Deficit Stress. *Plant*  
853 *Physiol.* 173: 1247–1257.
- 854 Martinez A. K., J. M. Soriano, R. Tuberosa, R. Koumproglou, T. Jahrmann, *et al.*, 2016 Yield  
855 QTLome distribution correlates with gene density in maize. *Plant Sci.* 242: 300–309.
- 856 Martini J. W. R., V. Wimmer, M. Erbe, and H. Simianer, 2016 Epistasis and covariance: how  
857 gene interaction translates into genomic relationship. *Theor. Appl. Genet.* 129: 963–976.
- 858 Martini J. W. R., N. Gao, D. F. Cardoso, V. Wimmer, M. Erbe, *et al.*, 2017 Genomic prediction



859 with epistasis models: on the marker-coding-dependent performance of the extended GBLUP  
860 and properties of the categorical epistasis model (CE). *BMC Bioinformatics* 18: 3.

861 McMullen M. D., S. Kresovich, H. S. Villeda, P. Bradbury, H. Li, *et al.*, 2009 Genetic properties  
862 of the maize nested association mapping population. *Science* 325: 737–740.

863 Mezmouk S., and J. Ross-Ibarra, 2014 The pattern and distribution of deleterious mutations in  
864 maize. *G3* 4: 163–171.

865 Mihaljevic R., H. F. Utz, and A. E. Melchinger, 2005 No Evidence for Epistasis in Hybrid and  
866 Per Se Performance of Elite European Flint Maize Inbreds from Generation Means and QTL  
867 Analyses. *Crop Sci.* 45: 2605–2613.

868 Millet E. J., W. Kruijer, A. Coupel-Ledru, S. Alvarez Prado, L. Cabrera-Bosquet, *et al.*, 2019  
869 Genomic prediction of maize yield across European environmental conditions. *Nat. Genet.* 51:  
870 952–956.

871 Minow M. A. A., L. M. Ávila, K. Turner, E. Ponzoni, I. Mascheretti, *et al.*, 2018 Distinct gene  
872 networks modulate floral induction of autonomous maize and photoperiod-dependent teosinte. *J.*  
873 *Exp. Bot.* 69: 2937–2952.

874 Moll R. H., M. F. Lindsey, and H. F. Robinson, 1964 Estimates of Genetic Variances and Level  
875 of Dominance in Maize. *Genetics* 49: 411–423.

876 Paschold A., Y. Jia, C. Marcon, S. Lund, N. B. Larson, *et al.*, 2012 Complementation contributes  
877 to transcriptome complexity in maize (*Zea mays* L.) hybrids relative to their inbred parents.  
878 *Genome Res.* 22: 2445–2454.

879 Ramstein G. P., J. Evans, A. Nandety, M. C. Saha, E. C. Brummer, *et al.*, 2018 Candidate  
880 Variants for Additive and Interactive Effects on Bioenergy Traits in Switchgrass (*Panicum*  
881 *virgatum* L.) Identified by Genome-Wide Association Analyses. *Plant Genome* 11.

- 882 <https://doi.org/10.3835/plantgenome2018.01.0002>
- 883 Reif J. C., A. E. Melchinger, X. C. Xia, M. L. Warburton, D. A. Hoisington, *et al.*, 2003 Genetic  
884 Distance Based on Simple Sequence Repeats and Heterosis in Tropical Maize Populations. *Crop*  
885 *Sci.* 43: 1275–1282.
- 886 Reif J. C., A. R. Hallauer, and A. E. Melchinger, 2005 Heterosis and heterotic patterns in maize.  
887 *Maydica* 50: 215.
- 888 Rodgers-Melnick E., P. J. Bradbury, R. J. Elshire, J. C. Glaubitz, C. B. Acharya, *et al.*, 2015  
889 Recombination in diverse maize is stable, predictable, and associated with genetic load. *Proc.*  
890 *Natl. Acad. Sci. U. S. A.* 112: 3823–3828.
- 891 Rodgers-Melnick E., D. L. Vera, H. W. Bass, and E. S. Buckler, 2016 Open chromatin reveals  
892 the functional maize genome. *Proc. Natl. Acad. Sci. U. S. A.* 113: E3177–84.
- 893 Romay M. C., M. J. Millard, J. C. Glaubitz, J. A. Peiffer, K. L. Swarts, *et al.*, 2013  
894 Comprehensive genotyping of the USA national maize inbred seed bank. *Genome Biol.* 14: R55.
- 895 Santantonio N., J.-L. Jannink, and M. Sorrells, 2019 Homeologous Epistasis in Wheat: The  
896 Search for an Immortal Hybrid. *Genetics* 211: 1105–1122.
- 897 Schadt E. E., S. A. Monks, T. A. Drake, A. J. Lusis, N. Che, *et al.*, 2003 Genetics of gene  
898 expression surveyed in maize, mouse and man. *Nature* 422: 297–302.
- 899 Schnable P. S., and N. M. Springer, 2013 Progress toward understanding heterosis in crop plants.  
900 *Annu. Rev. Plant Biol.* 64: 71–88.
- 901 Searle S. R., G. Casella, and C. E. McCulloch, 2009 *Variance Components*. John Wiley & Sons.
- 902 Shull G. H., 1908 The composition of a field of maize. *J. Hered.* 296–301.
- 903 Shull G. H., 1914 Duplicate genes for capsule-form in *Bursa bursa-pastoris*. *Z. Ver-erbungslehre*  
904 12: 97–149.

905 Spindel J. E., H. Begum, D. Akdemir, B. Collard, E. Redoña, *et al.*, 2016 Genome-wide  
906 prediction models that incorporate de novo GWAS are a powerful new tool for tropical rice  
907 improvement. *Heredity* 116: 395–408.

908 Springer N. M., and R. M. Stupar, 2007 Allelic variation and heterosis in maize: how do two  
909 halves make more than a whole? *Genome Res.* 17: 264–275.

910 Stupar R. M., and N. M. Springer, 2006 Cis-transcriptional variation in maize inbred lines B73  
911 and Mo17 leads to additive expression patterns in the F1 hybrid. *Genetics* 173: 2199–2210.

912 Swanson-Wagner R. A., Y. Jia, R. DeCook, L. A. Borsuk, D. Nettleton, *et al.*, 2006 All possible  
913 modes of gene action are observed in a global comparison of gene expression in a maize F1  
914 hybrid and its inbred parents. *Proc. Natl. Acad. Sci. U. S. A.* 103: 6805–6810.

915 Technow F., T. A. Schrag, W. Schipprack, E. Bauer, H. Simianer, *et al.*, 2014 Genome  
916 properties and prospects of genomic prediction of hybrid performance in a breeding program of  
917 maize. *Genetics* 197: 1343–1355.

918 Thiemann A., J. Fu, F. Seifert, R. T. Grant-Downton, T. A. Schrag, *et al.*, 2014 Genome-wide  
919 meta-analysis of maize heterosis reveals the potential role of additive gene expression at  
920 pericentromeric loci. *BMC Plant Biol.* 14: 88.

921 VanRaden P. M., 2008 Efficient methods to compute genomic predictions. *J. Dairy Sci.* 91:  
922 4414–4423.

923 Wallace J. G., P. J. Bradbury, N. Zhang, Y. Gibon, M. Stitt, *et al.*, 2014 Association mapping  
924 across numerous traits reveals patterns of functional variation in maize. *PLoS Genet.* 10:  
925 e1004845.

926 Wang L., T. M. Beissinger, A. Lorant, C. Ross-Ibarra, J. Ross-Ibarra, *et al.*, 2017 The interplay  
927 of demography and selection during maize domestication and expansion. *Genome Biol.* 18: 215.

928 Wood S. N., 2003 Thin plate regression splines. *J. R. Stat. Soc. Series B Stat. Methodol.* 65: 95–  
929 114.

930 Yang Q., Z. Li, W. Li, L. Ku, C. Wang, *et al.*, 2013 CACTA-like transposable element in  
931 ZmCCT attenuated photoperiod sensitivity and accelerated the postdomestication spread of  
932 maize. *Proc. Natl. Acad. Sci. U. S. A.* 110: 16969–16974.

933 Yang J., S. Mezmouk, A. Baumgarten, E. S. Buckler, K. E. Guill, *et al.*, 2017 Incomplete  
934 dominance of deleterious alleles contributes substantially to trait variation and heterosis in  
935 maize. *PLoS Genet.* 13: e1007019.

936 Zhao H., Z. Sun, J. Wang, H. Huang, J.-P. Kocher, *et al.*, 2014 CrossMap: a versatile tool for  
937 coordinate conversion between genome assemblies. *Bioinformatics* 30: 1006–1007.

938 Zhou X., and M. Stephens, 2012 Genome-wide efficient mixed-model analysis for association  
939 studies. *Nat. Genet.* 44: 821–824.

940 Zhou X., P. Carbonetto, and M. Stephens, 2013 Polygenic modeling with bayesian sparse linear  
941 mixed models. *PLoS Genet.* 9: e1003264.

942 Zhou P., C. N. Hirsch, S. P. Briggs, and N. M. Springer, 2019 Dynamic Patterns of Gene  
943 Expression Additivity and Regulatory Variation throughout Maize Development. *Mol. Plant* 12:  
944 410–425.

945

## ① Within-locus complementation

| Hypothesis                                    | DTS  | PH     | GY     |
|-----------------------------------------------|------|--------|--------|
| Partition of variability by dominance effects | +    | +      | +      |
| Dominance effects at QTLs                     | N.S. | No QTL | No QTL |
| Linear effect of inbreeding                   | -    | +      | +      |
| Conclusion                                    | DTS  | PH     | GY     |
| Prevalent dominance gene action               | -    | +      | +      |

## ② Enrichment of genetic effects by functional features

| Hypothesis                                    | DTS  | PH   | GY   |
|-----------------------------------------------|------|------|------|
| Enrichment in genic regions                   | +    | +    | +    |
| Enrichment in low-recombination regions       | N.S. | N.S. | N.S. |
| Enrichment at evolutionarily constrained loci | N.S. | N.S. | N.S. |
| Conclusion                                    | DTS  | PH   | GY   |
| Complementation in proximal gene regions      | +    | +    | +    |

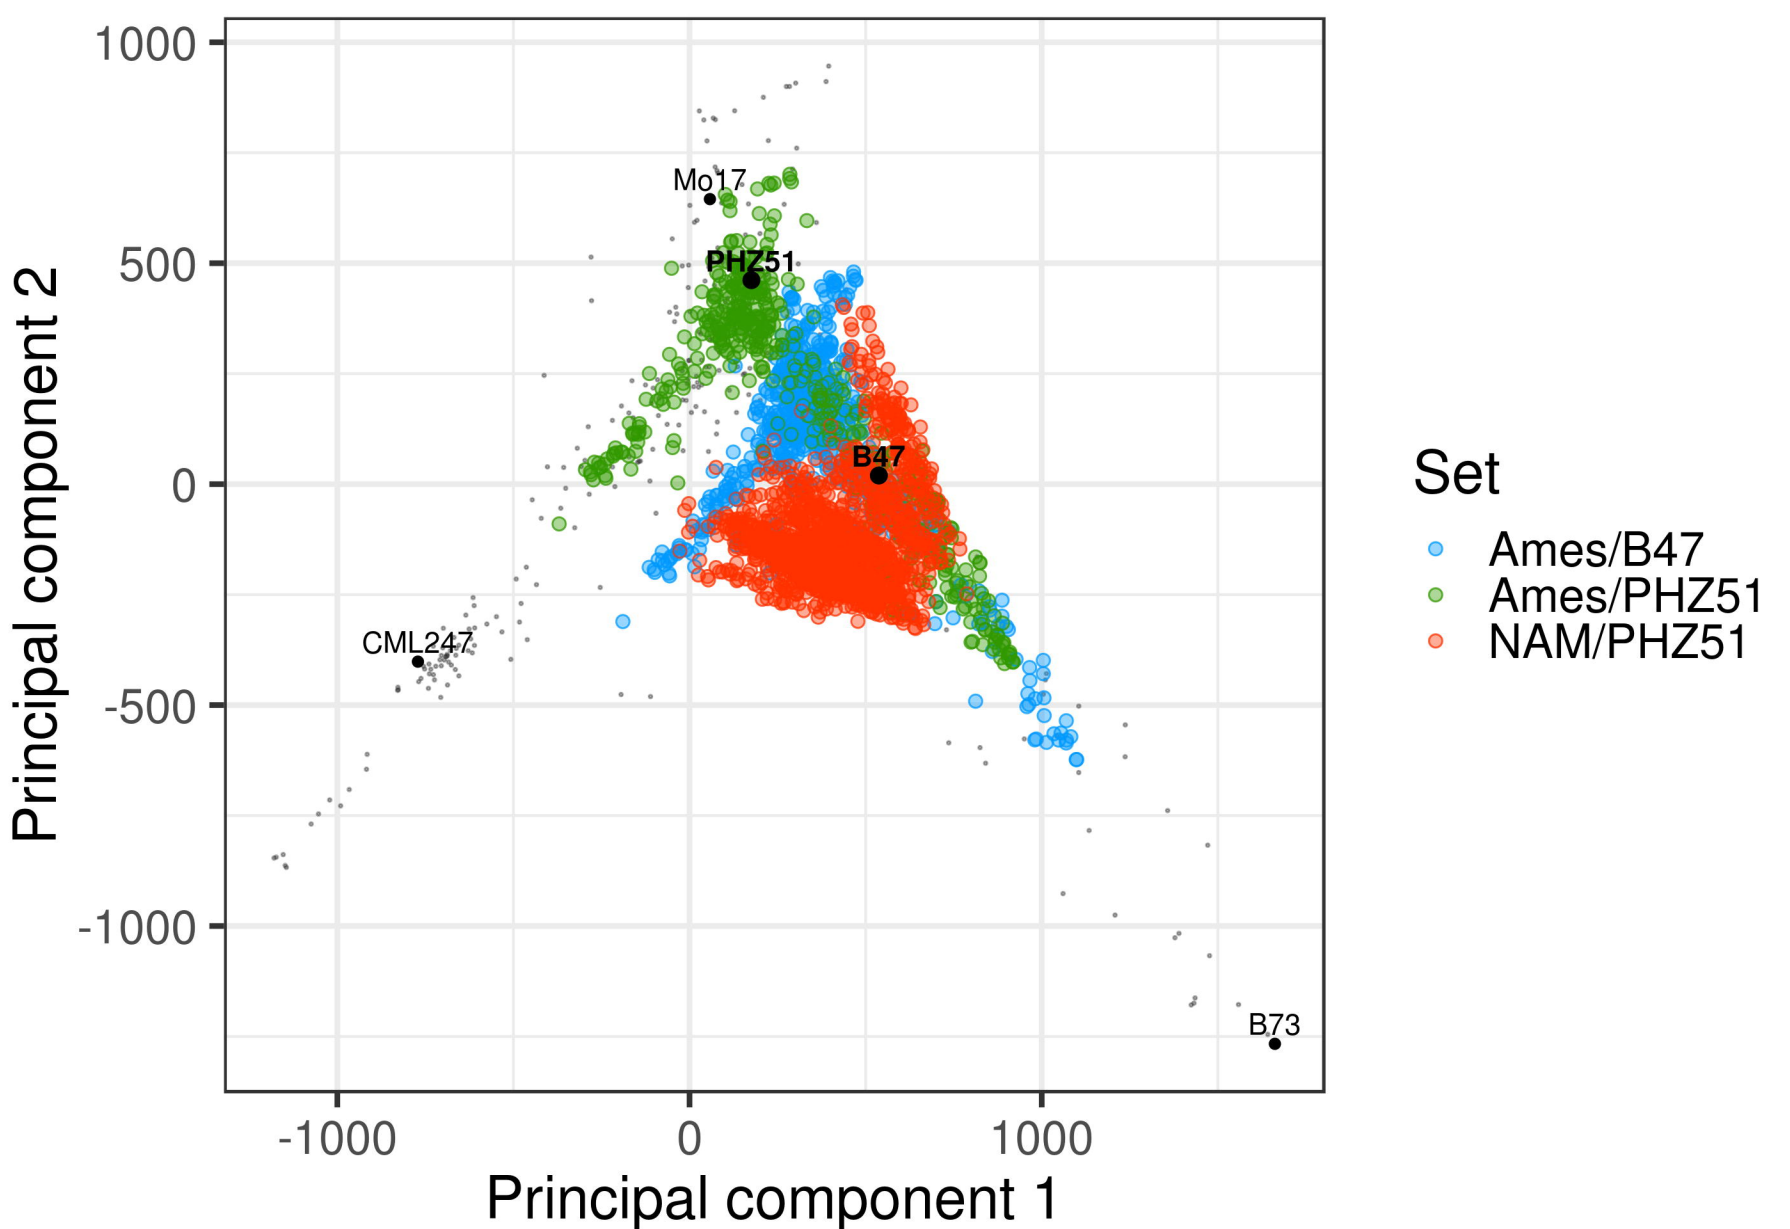

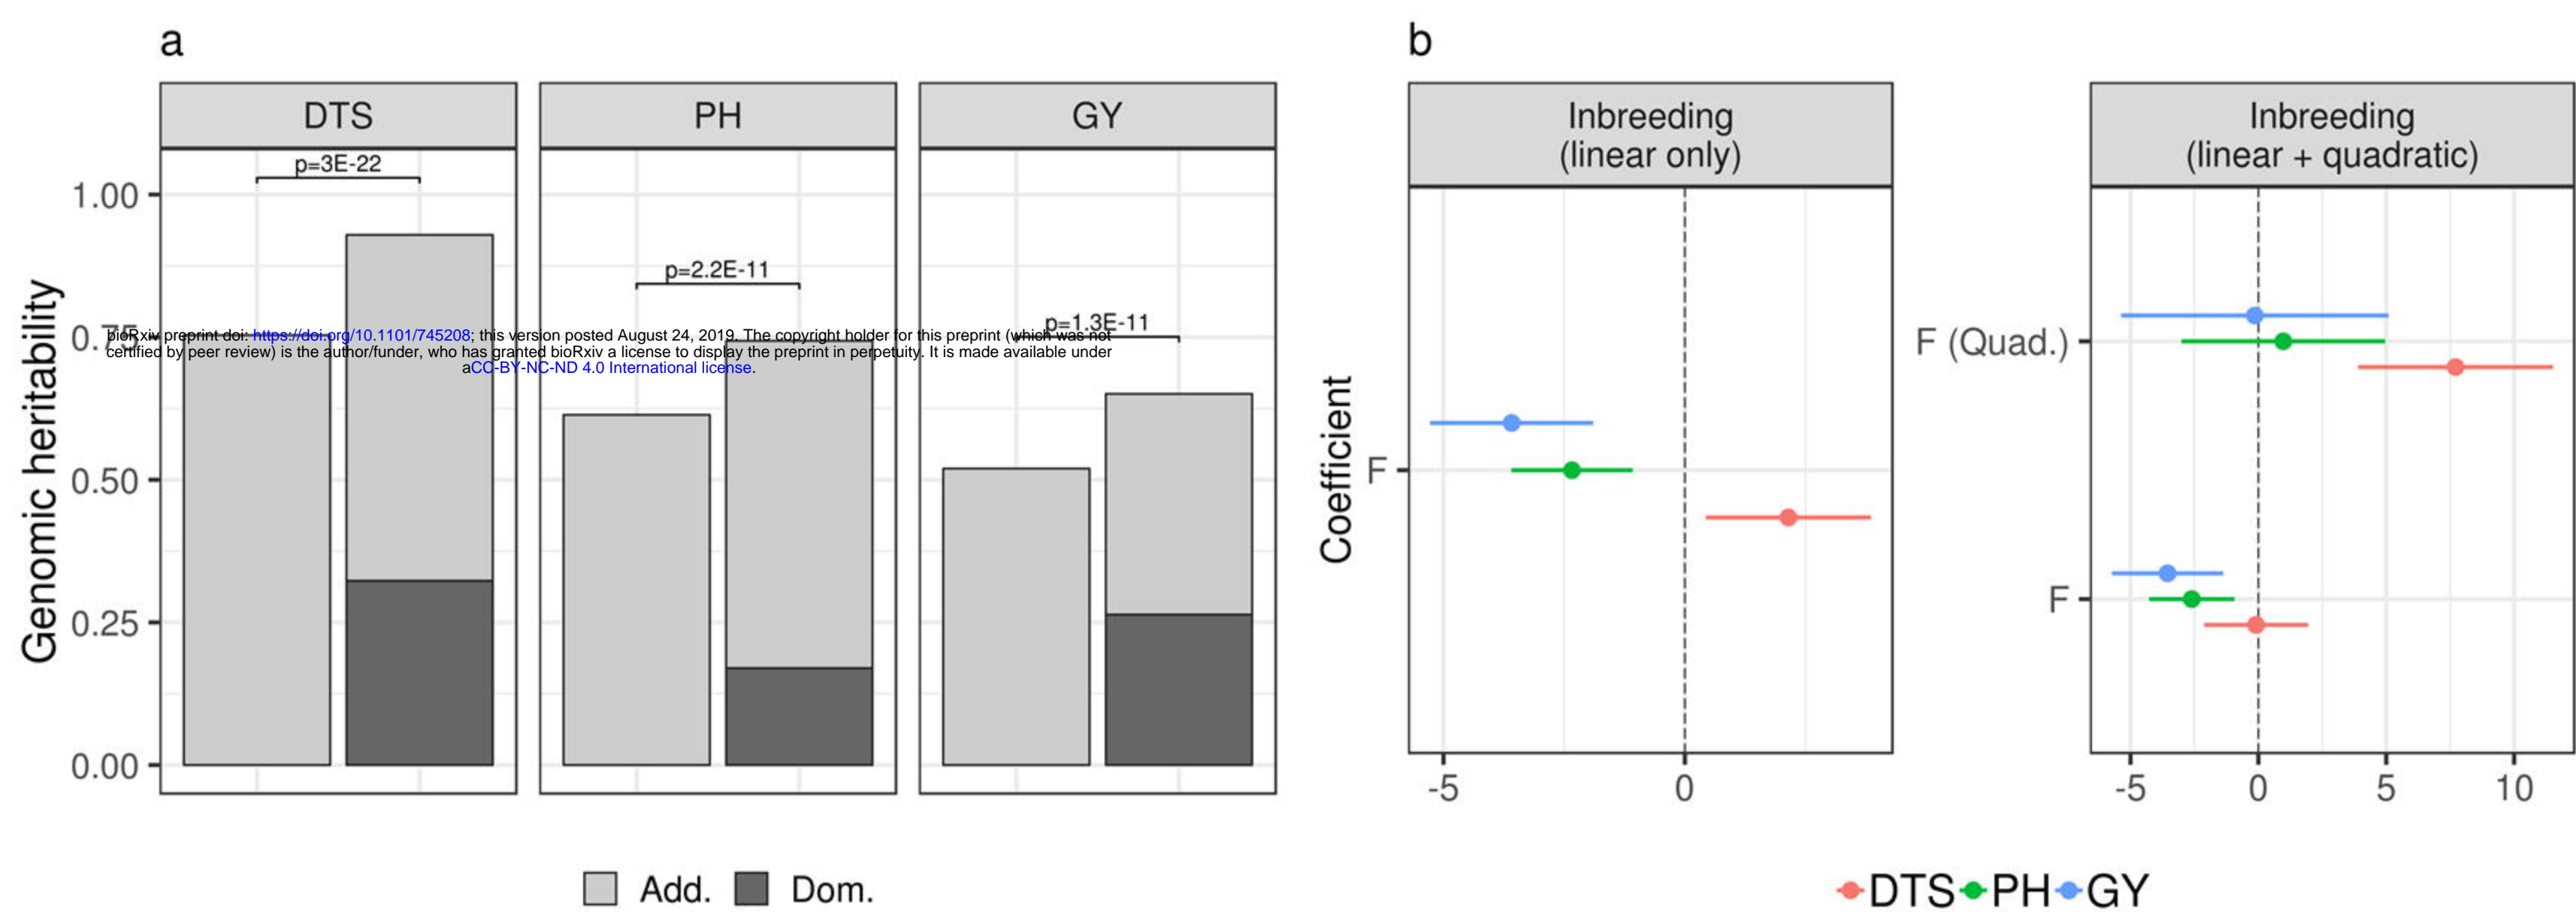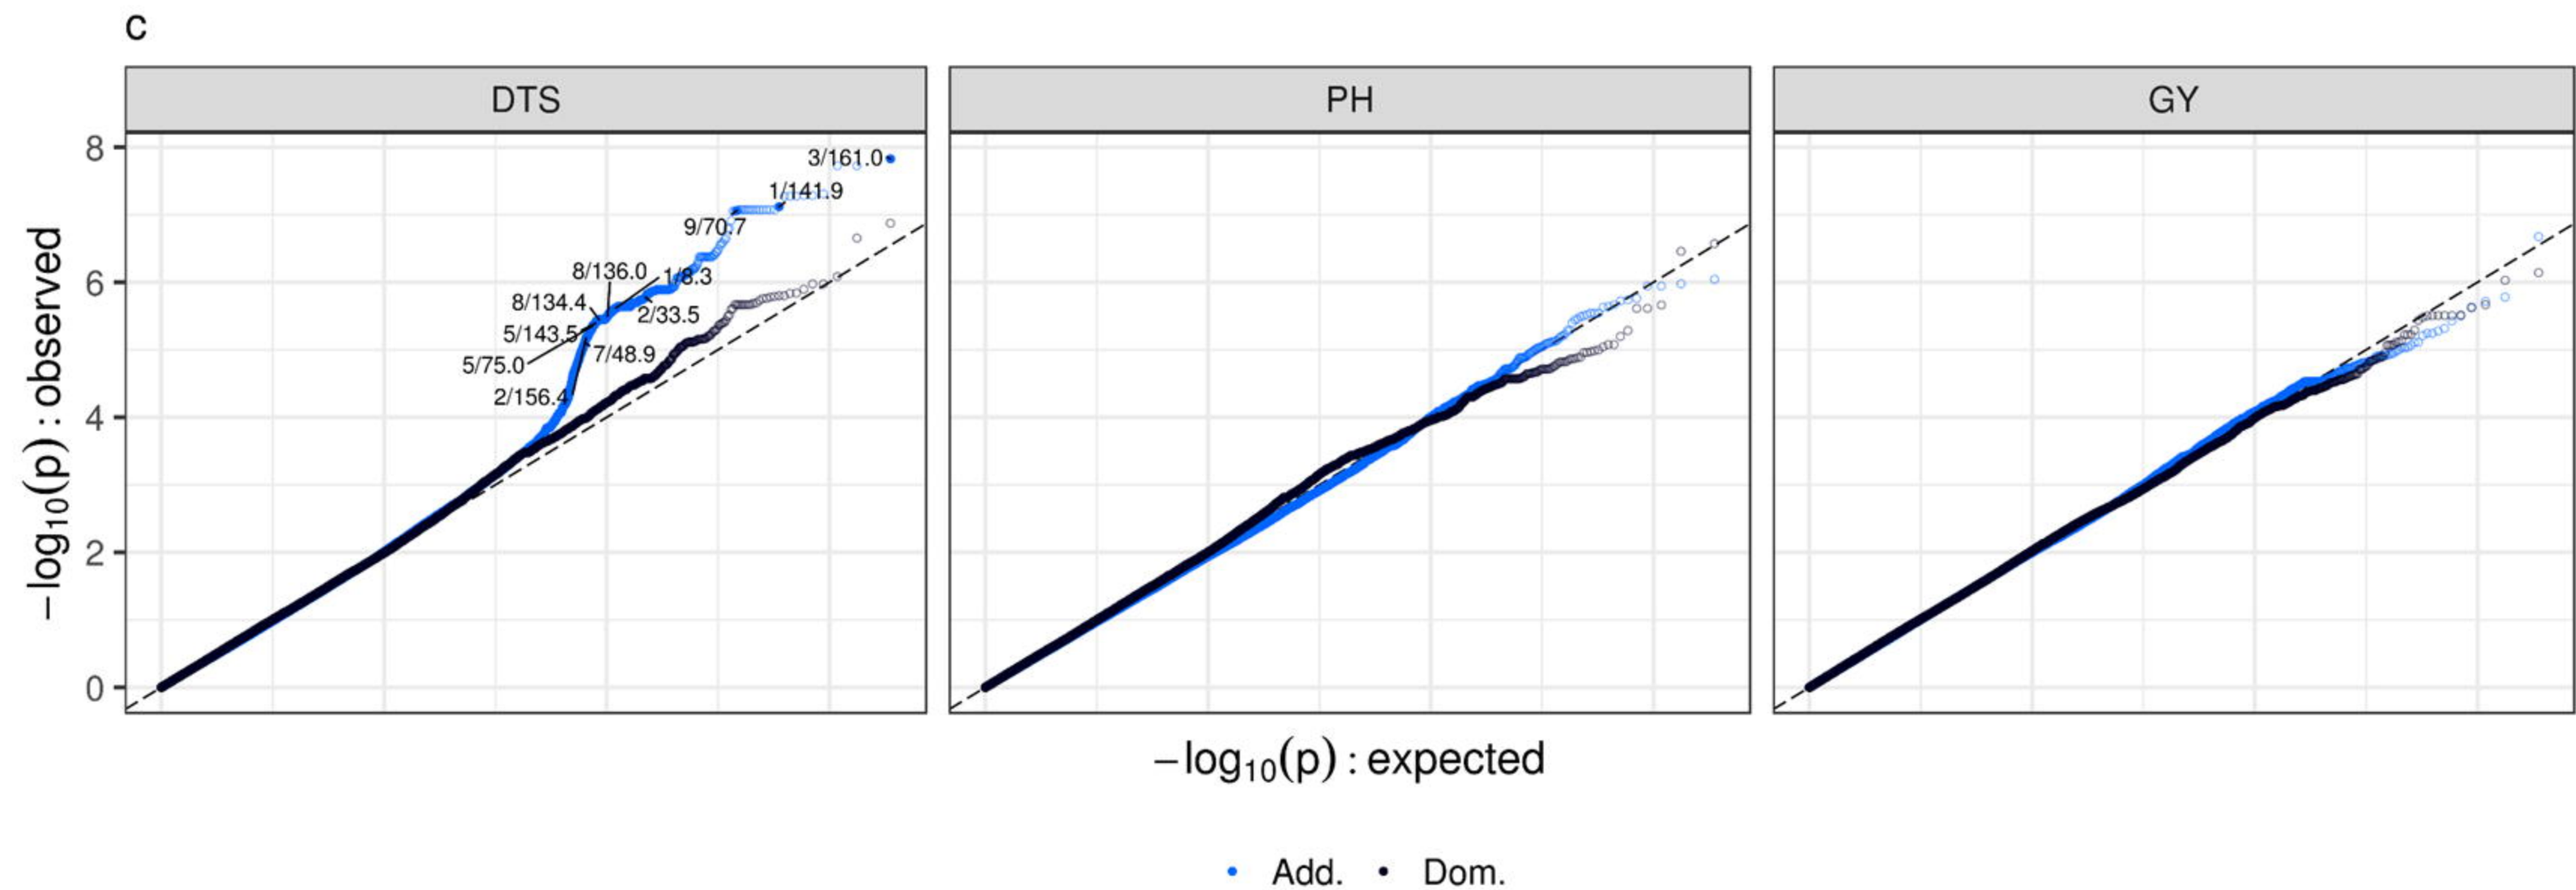

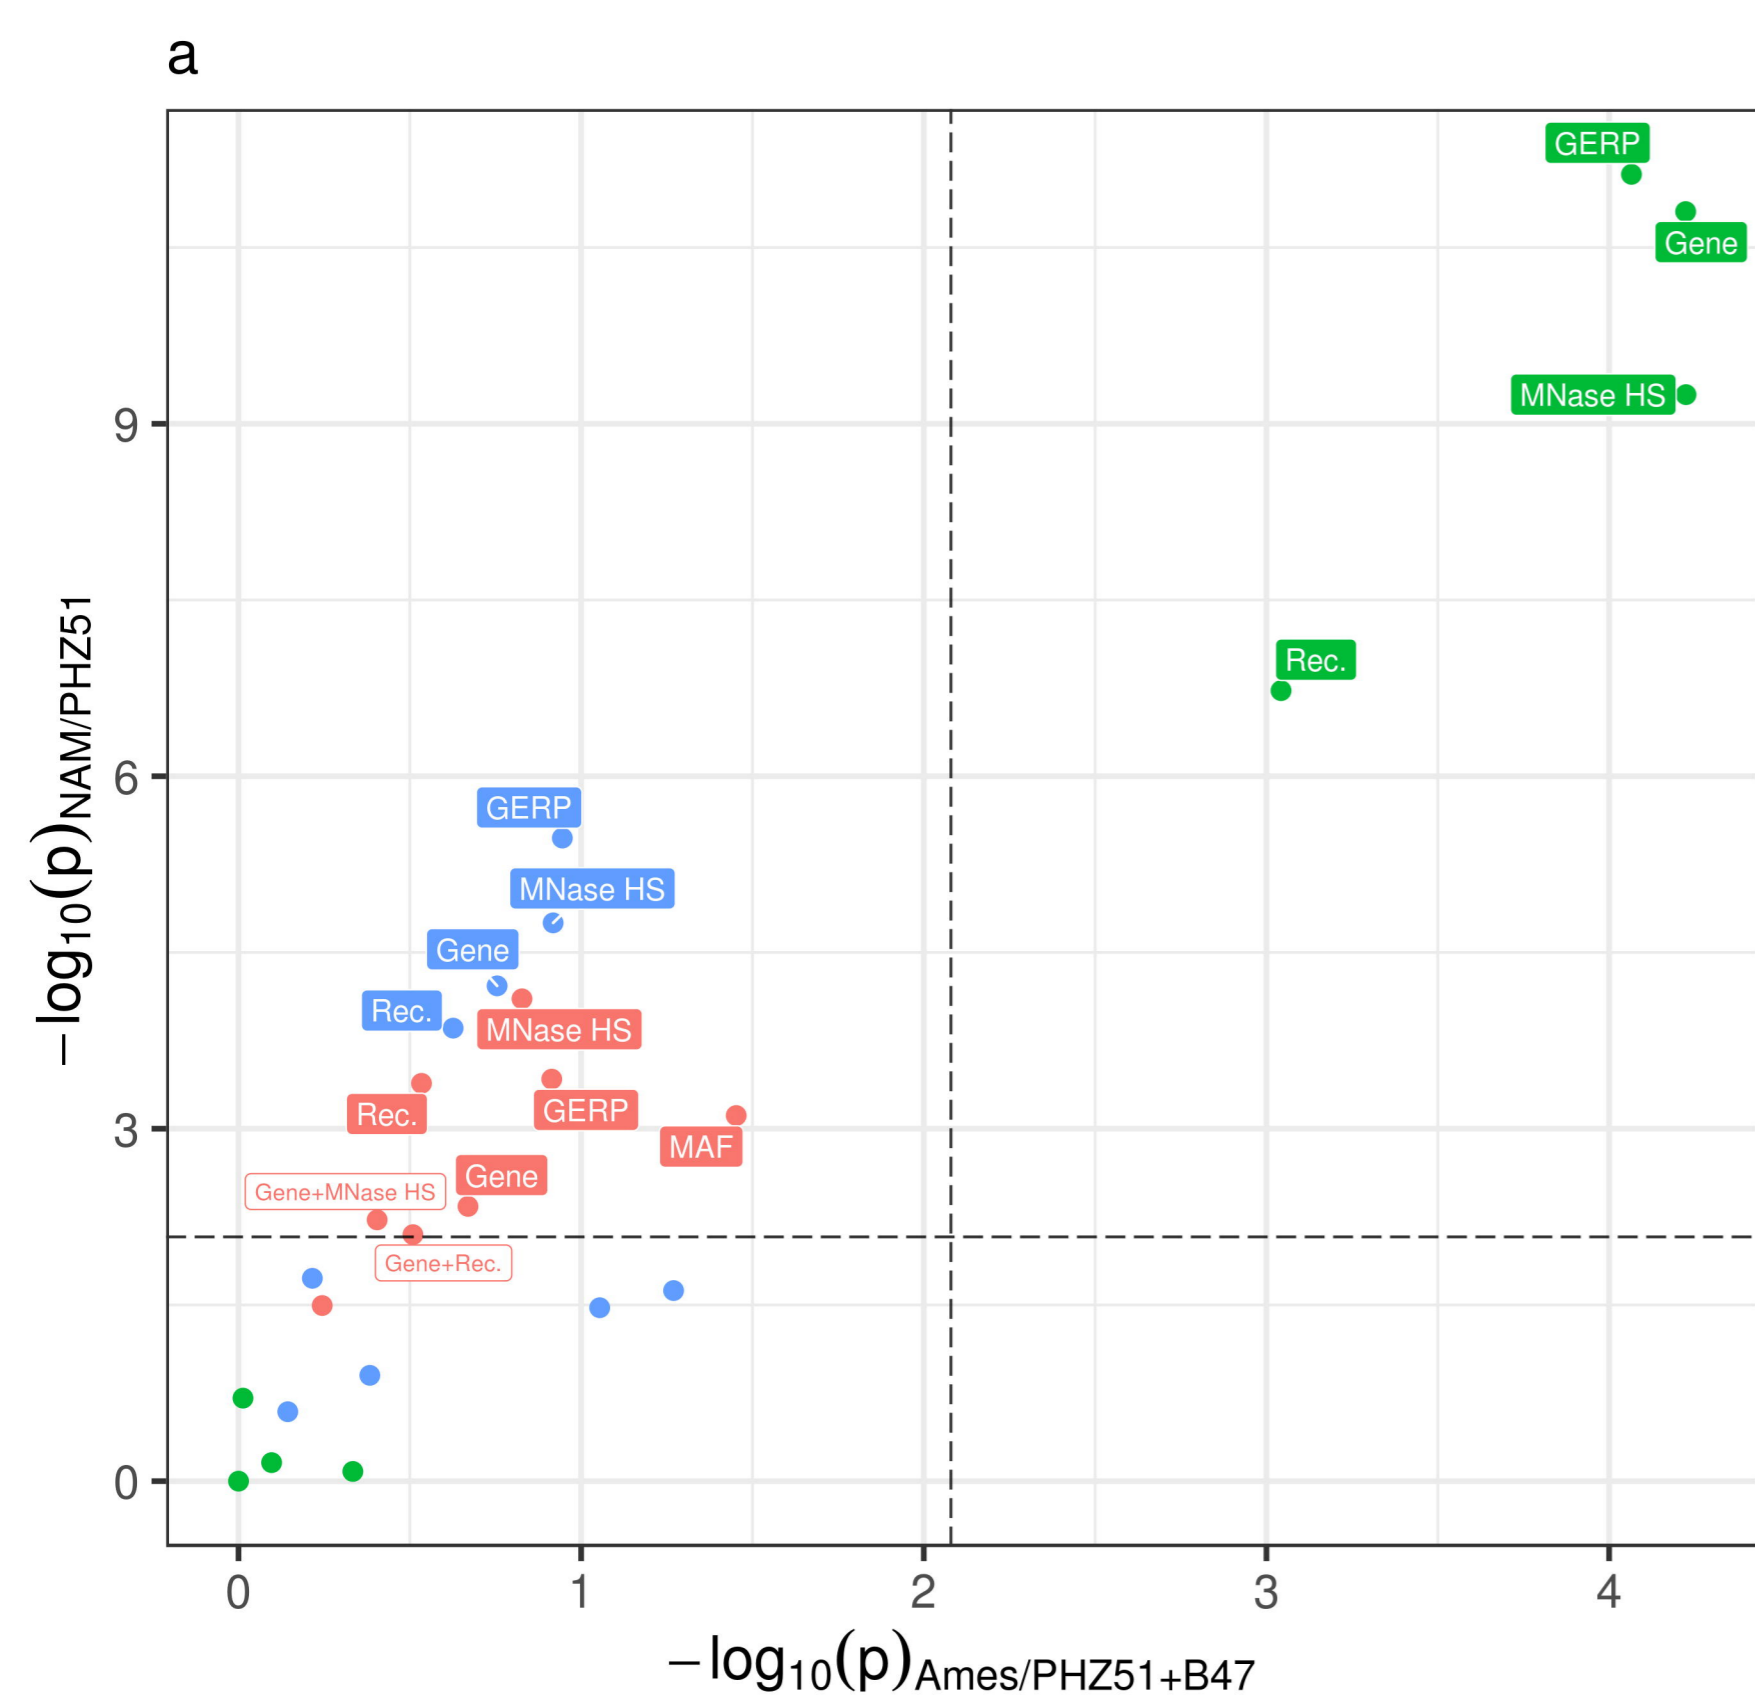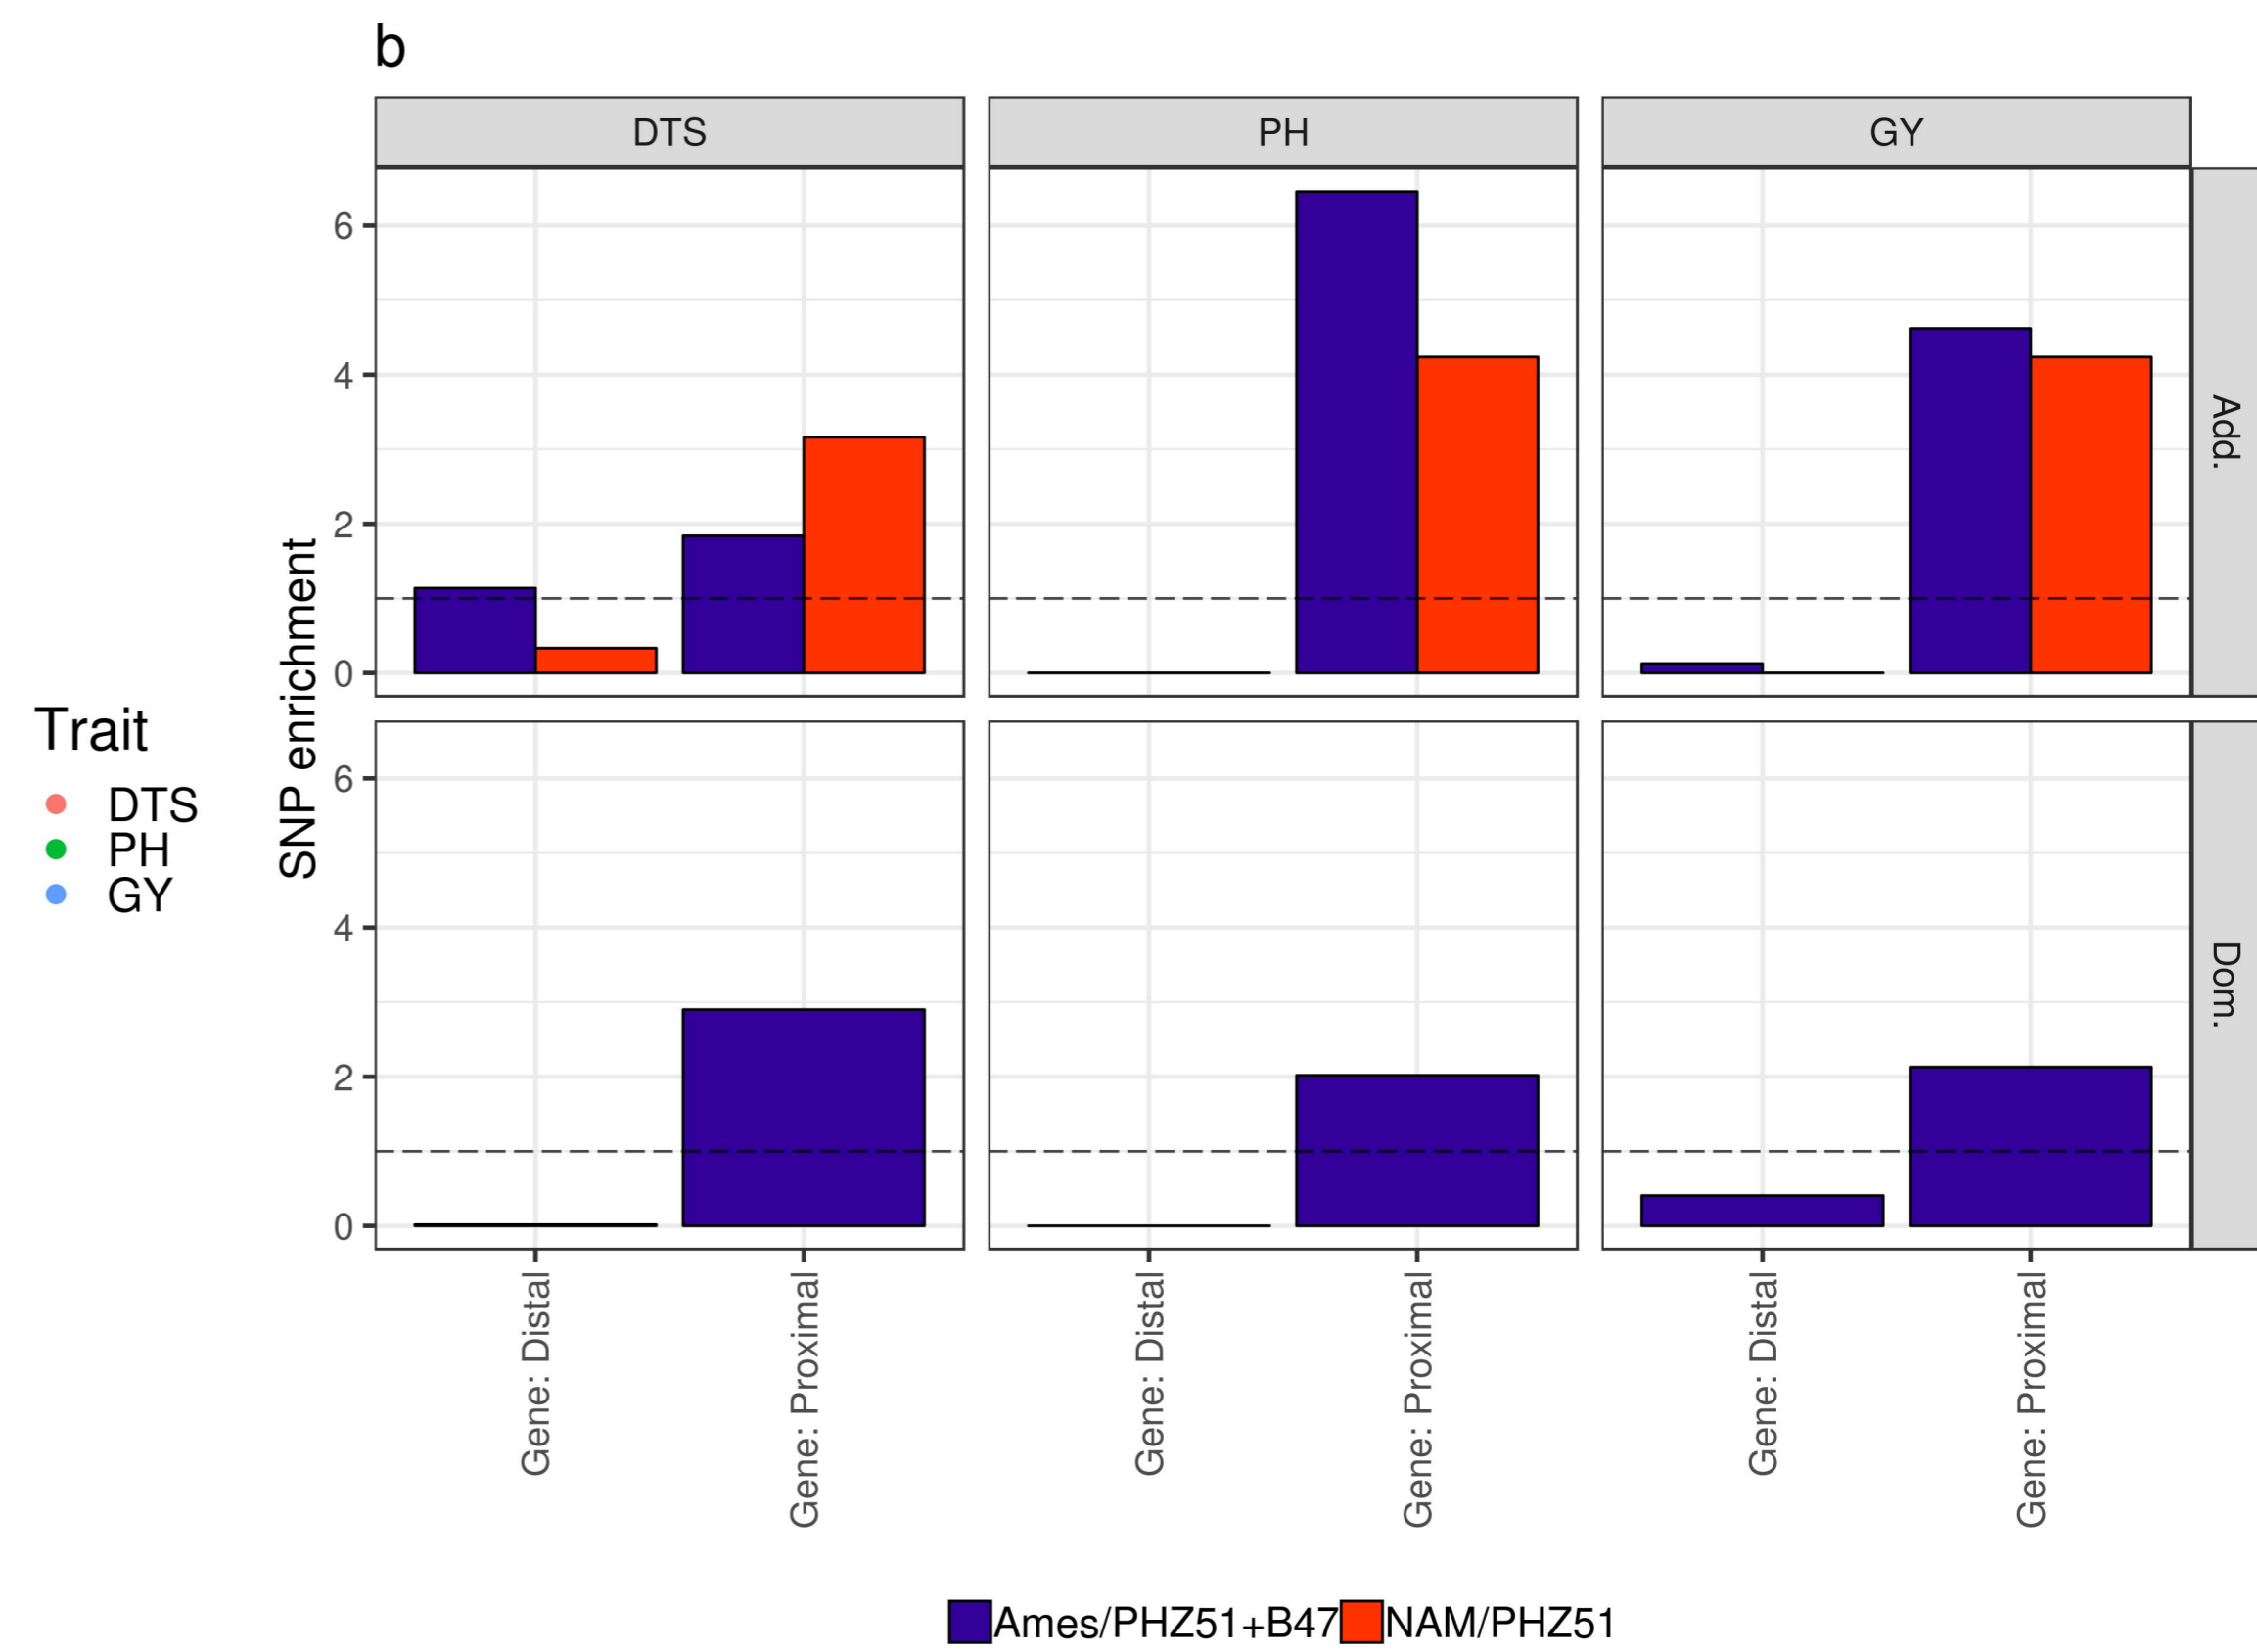

Source: http://biorxiv.org/content/10.1101/745208v1.full.pdf
